1 **The anatomical boundary of the rat claustrum**

2 Christopher M Dillingham<sup>1,2\*</sup>, Mathias L Mathiasen<sup>2\*</sup>, Bethany E Frost<sup>1</sup>, Marie AC Lambert<sup>3</sup>, Emma J  
3 Bubb<sup>2</sup>, Maciej M Jankowski<sup>4</sup>, John P Aggleton<sup>2</sup> and Shane M O'Mara<sup>1</sup>

4 <sup>1</sup>Institute of Neuroscience, Trinity College Dublin, College Green, Dublin 2, Ireland

5 <sup>2</sup>School of Psychology, Cardiff University, Cardiff, Wales, UK

6 <sup>3</sup>Université de Poitiers, Faculté des Sciences Fondamentales et Appliquées, Poitiers, France

7 <sup>4</sup>Department of Neurobiology, The Hebrew University of Jerusalem, Jerusalem, Israel.

8 \* CMD and MLM contributed equally to this study

9

10 Correspondence:

11 [smomara@tcd.ie](mailto:smomara@tcd.ie)

12

13 **Keywords:** parvalbumin, crystallin mu; guanine nucleotide binding protein (G protein), gamma 2;  
14 neocortex; midline thalamus; neuronal tracer; immunohistochemistry; immunofluorescence.

15

16

17

18

19

20

21

22

23

24

25

26

27

28

29

30

31

32

33

34

1 **Abstract**

2 The claustrum is a subcortical nucleus that exhibits dense connectivity across the neocortex.  
3 Considerable recent progress has been made in establishing its genetic and anatomical  
4 characteristics, however a core, contentious issue that regularly presents in the literature pertains to  
5 the rostral extent of its anatomical boundary. The present study addressed this issue in the rat brain.

6 Using a combination of immunohistochemistry and neuronal tract tracing, we have examined the  
7 expression profiles of several genes that have previously been identified as exhibiting a differential  
8 expression profile in the claustrum relative to the surrounding cortex. The expression profiles of  
9 parvalbumin, crystallin mu (Crym), and guanine nucleotide binding protein (G protein), gamma 2  
10 (Gng2) were assessed immunohistochemically alongside, or in combination with cortical  
11 anterograde, or retrograde tracer injections. Retrograde neuronal tracer injections into various  
12 thalamic nuclei were used to further establish the rostral border of the claustrum.

13 Expression of all three markers delineated a nuclear boundary that extended considerably (~500  $\mu\text{m}$ )  
14 beyond the anterior horn of the neostriatum. Cortical retrograde and anterograde neuronal tracer  
15 injections, respectively, revealed distributions of cortically-projecting claustral neurons and cortical  
16 efferent inputs to the claustrum that overlapped with the gene marker-derived claustrum boundary.  
17 Finally, retrograde tracer injections centred in nucleus reuniens, whilst including the rhomboid,  
18 mediodorsal and centromedial nuclei, revealed that insular cortico-thalamic projections  
19 encapsulated a claustral area, with strongly diminished cell label, that corresponded to the  
20 claustrum.

21

22

23

24

## 1 Introduction

2 The claustrum is a highly conserved nucleus that is not only present in all placental species (Baizer et  
3 al., 2014) but is also found in *Aves* (Puelles et al. 2016). The claustrum also exhibits genetic  
4 characteristics (Mathur et al., 2009; Smith and Alloway, 2010a; Pirone et al., 2012; Hinova-Palova et  
5 al., 2014a; b; Sanchez-Vives et al., 2015; Kim et al., 2016; Qadir et al., 2018), and cortical connectivity  
6 (Kitanishi and Matsuo, 2016; Patzke et al., 2014; Smith et al., 2014; Smith and Alloway, 2010a; Wang  
7 et al., 2017; White et al., 2017; Zingg et al., 2018) that appear to be largely conserved across species  
8 (see Buchanan and Johnson, 2011). Progress in understanding the complexities of the rodent  
9 claustrum have, however, been hindered by both its irregular shape as well as its small cross-  
10 sectional area, factors that have precluded, for instance, effective electrophysiological  
11 characterisation. Progress has also been held back by a lack of clarity concerning the extent of its  
12 anatomical boundaries, an issue that is seated in the fact that rodents are lissencephalic and, as such,  
13 lack a well-defined extreme capsule (a structure that in gyrencephalic species provides a clear  
14 boundary between the claustrum and the neighbouring cortex; for a recent review, see Smith et al.  
15 2018). To overcome the problems that the resulting claustrum-cortical continuity has presented, a  
16 sustained focus has been on identifying genes that show a differential expression profile in the  
17 claustrum relative to surrounding cortical areas. To this end, considerable progress has been made  
18 (Mathur, 2014; Mathur et al., 2009; Wang et al., 2017; Watakabe, 2017). Crystallin mu (Crym)  
19 expression, for instance, is densely expressed in the insular cortex yet is highly attenuated in the  
20 claustrum. Indeed, Crym expression was fundamental to establishing that the claustrum is  
21 surrounded on all sides by cortex rather than being juxtaposed with the external capsule (Mathur et  
22 al., 2009), as was thought previously. In the same study, the nuclear boundary of the claustrum at  
23 the level of the striatum was defined using the expression profiles of parvalbumin, cytochrome  
24 oxidase, and the guanine nucleotide binding protein (G protein), gamma 2 (Gng2; Mathur et al.,  
25 2009). More recently, Wang et al (2017) compiled a list of 49 genes that are differentially expressed  
26 in the mouse claustrum.

27 Alongside this progression, however, attempts to resolve the issue of whether, or not, the rostral  
28 boundary of the claustrum extends beyond the anterior aspect of the striatum have seen limited  
29 progress. In the seminal work of Mathur et al. (2009), the apparent absence of parvalbumin and  
30 Gng2 expression within the atlas-defined boundary of the rostral claustrum prompted a  
31 reassessment of the anatomical boundary of the claustrum to one that did not extend beyond the  
32 anterior horn of the neostriatum. Subsequent anatomical and behavioural studies have, for the most  
33 part, conformed to the Gng2-based anatomical definition of Mathur et al. (e.g. Smith and Alloway  
34 2010a). In a recent review, however, Smith and colleagues (2018) highlight the importance of  
35 reaching a resolution in future studies. Indeed, in another recent review (Dillingham et al., 2017),  
36 using a freely available nucleotide sequence expression mouse brain database (Allen Mouse Brain  
37 Atlas; available at: <http://mouse.brain-map.org/>), the expression of a number of genes that were  
38 identified as having differential expression in the claustrum (Mathur et al., 2009; Wang et al., 2017)  
39 were assessed. Of 49 genes, the striatal - claustrum boundary, delineated either by attenuated  
40 expression (e.g. Slit-1, Crym), or enriched expression (e.g. Gng2, Gnb4, latexin), was found to extend  
41 considerably rostral to the striatum. Significantly, however, unlike atlas-based delineations, the oval  
42 cross section of the claustrum is situated at the ventrolateral aspect of the forceps minor of the  
43 corpus callosum, i.e. maintaining its locus in Layer 6 of the insular cortex. Given the multimodal  
44 nature of the claustrum (Remedios et al., 2010) and the likelihood that the separate 'puddles' of  
45 (presumably functional) connectivity act in concert (Smythies et al., 2014), it is all the more  
46 important that a consensus in the field relating to its anatomical boundaries is reached.

1 In the present study, a combination of immunohistochemistry, immunofluorescence, and neuronal  
2 tracing was employed to examine the expression patterns of several genes that have been identified  
3 as verified claustral markers. One, crystallin mu (Crym), exhibits an attenuated expression in the  
4 claustrum relative to surrounding cortex (Mathur et al., 2009), while Gng2 (Mathur et al., 2009) and  
5 parvalbumin (Druga et al.; Hinova-Palova et al., 2014a; Mathur et al., 2009; Pirone et al., 2015;  
6 Rahman and Baizer, 2007) show enriched expression in the claustrum. In combination with  
7 anterograde and retrograde anatomical tracing, the expression profiles of these genes have been  
8 reassessed in the rat brain with a focus on establishing the rostral boundary of the claustrum.

## 9 **Methods**

### 10 *Subjects*

11 A total of 41 male Lister Hooded rats (Envigo, UK) with pre-procedural weights of between 230-350g  
12 were used in the study. In 6 animals, retrograde neuronal tracer injections targeted nucleus reuniens  
13 (RE) and/or the rhomboid (Rh) nucleus of the midline thalamus and in one of these cases, a further  
14 retrograde tracer injection targeted the mediodorsal (MD), centromedial (CM) and paraventricular  
15 thalamic nuclei (some of these cases used in Mathiasen et al., 2019; **Table 1**). In 2 of the animals  
16 with RE/Rh injections the injection site also included a portion of the centromedial thalamic nucleus.  
17 Further, in 18 animals, retrograde (n = 13) or anterograde (n = 5) tracer injections targeted the  
18 retrosplenial (RSC) or anterior cingulate (Cg) cortices (**Table 1**). In 6 of the animals with tracer  
19 injections we further stained for parvalbumin immunofluorescence marker, while a further 16  
20 animals were used for immunohistochemistry (no tracer injections; **Table 1**)

### 21 *Compliance with Ethical Standards*

22 Animal husbandry and experimental procedures were carried out in accordance with the European  
23 Community directive, 86/609/EC, and the Cruelty to Animals Act, 1876, and were approved by the  
24 Comparative Medicine/Bioresources Ethics Committee, Trinity College, Dublin, Ireland, and followed  
25 LAST Ireland and international guidelines of good practice or, for those experiments that were  
26 performed at Cardiff University, in accordance with the UK Animals (Scientific Procedures) Act, 1986  
27 and associated guidelines, the EU directive 2010/63/EU, as well as the Cardiff University Biological  
28 Standards Committee.

### 29 *Surgical procedures*

30 Anaesthesia was induced and maintained with isoflurane (5% and 1–2%, respectively) combined  
31 with oxygen (2 L/minute). Animals were then placed in a stereotaxic frame (Kopf, Tujunga, CA, USA)  
32 and chloramphenicol eye ointment (Martindale Pharmaceuticals, Romford, UK) was topically applied  
33 to the eyes to protect the cornea. Pre-surgical analgesia (Metacam, 1 mg/kg; Boehringer Ingelheim,  
34 Germany) and antibiotics (Enrocare; Animal Care Ltd., York, UK) were administered subcutaneously.  
35 The scalp was incised and cleaned before craniotomies were made, large enough to permit  
36 advancement of a Hamilton syringe into thalamic or neocortical regions. For retrograde tracing we  
37 injected either Fast Blue (FB; Polysciences), Fluorogold (FG; Santa Cruz Biotechnology, Heidelberg,  
38 Germany), or cholera-toxin b (CtB; List Biological Labs Ltd., California, USA). For anterograde tracing  
39 we injected an adeno-associated virus expressing either MCherry (pAAV-CaMKIIa-hM4D(Gi)-  
40 Mcherry) (AAV5), or GFP (pAAV-CaMKIIa-EGFP; AAV5) as a fluorescent marker (Addgene, Cambridge  
41 Massachusetts, US).

42 Following tracer-specific survival times, ranging from 5 days to 7 weeks (the latter for viral injections  
43 in anterior cingulate only), rats were deeply anaesthetised with sodium pentobarbital (Euthanimal)

1 and perfused transcardially with ice cold 0.1M phosphate buffered saline (PBS) followed by either  
2 2.5% or 4% paraformaldehyde in 0.1M PBS.

### 3 *Immunohistochemistry (IHC)*

4 In cases used for immunohistochemistry (with no tracer injections), the brains were removed and  
5 post-fixed for 48 hours before being transferred to a 25% sucrose in 0.1M PBS solution for 1-2 days  
6 for cryoprotection. Sections of 40µm were cut on a cryostat (Leica CM1850) with one 1-in-4 series  
7 mounted directly on to double gelatine-subbed microscope slides. Of the remaining 3, 1-in-4 series,  
8 one or more of: an anti-Gng2 polyclonal antibody raised in rabbit (Sigma-Aldrich Ireland Ltd;  
9 Wicklow, Ireland), an anti-Crym monoclonal antibody raised in mouse (Novus Biologicals; Abingdon,  
10 UK), and an anti-parvalbumin monoclonal raised in mouse (Swant Inc. Marly, Switzerland) were used  
11 to immunolocalise the respective proteins.

12 Initially, endogenous peroxidases were removed from free-floating brain sections through reaction  
13 in a quench solution containing 10% methanol and 0.3% hydrogen peroxide in distilled water.  
14 Following washes in PBS and subsequently PBST (0.05% Triton X-100 in 0.1M PBS), the sections were  
15 agitated in a 4% solution of normal horse serum in 0.1M PBS for 2 hours. Sections were then  
16 transferred to a 1:200 dilution of either anti-Crym or anti-Gng2 in 0.1M PBST with 1% normal horse  
17 serum and agitated at 4°C overnight. Following washes in PBST, sections were transferred to a 1:250  
18 dilution of biotinylated horse-anti-mouse IgG (for sections reacted against Crym; Vector Labs,  
19 Peterborough, UK) or biotinylated horse-anti-rabbit IgG (for sections reacted against Gng2; Vector  
20 Labs, UK) for 2 hours. Sections were then washed in PBST before undergoing signal amplification  
21 through incubation in the Vectastain ABC solution (Vector Labs, Peterborough, UK) for 2 hours.  
22 Following washes in PBST and subsequently PBS, sections were agitated overnight at 4°C.  
23 Immunoreactivity was visualised using the chromagen diaminobenzidine (DAB; Vector Labs,  
24 Peterborough, UK) and in some cases, the signal was intensified with by adding nickel chloride to the  
25 DAB solution. Sections were then washed in PBS, mounted, and left to dry at room temperature  
26 before being dehydrated in ascending alcohols, cleared in xylene, and coverslipped with DPX  
27 mounting medium (Sigma-Aldrich, Gillingham, UK).

### 28 *Immunofluorescence staining*

29 In cases with anterograde or retrograde tracer injections, brains were post-fixed for 4 hours before  
30 being transferred to a 25% sucrose solution overnight. Sections of either 40µm or 50µm were cut in  
31 the coronal plane with a freezing microtome with one 1:4 series used for Nissl staining, a second  
32 series used for visualization of the tracers and, in some cases, remaining series were used for further  
33 immunofluorescence staining (**Table 1**).

34 For visualization of neuronal tracers, brain sections were washed in PBS and PBS-TX followed by  
35 incubation with the relevant primary antibody (rabbit anti cholera toxin (Sigma-Aldrich UK) or rabbit  
36 anti-Mcherry (1:2000 dilution; Abcam, Cambridge, UK) overnight. Following PBS-TX washes the  
37 sections were incubated with the secondary antibody (1:200 dilution; goat anti-rabbit DyLight 594;  
38 Vector Laboratories; Peterborough, UK), washed in PBS, mounted and coverslipped either directly  
39 with Fluoromount (Sigma-Aldrich, Gillingham, UK) or alternatively, following dehydration in  
40 ascending alcohols, with DPX mounting medium (ThermoFisher, Waltham, MA).

41 In a number of these cases (see **Table 1**) sections were further stained for mouse anti-parvalbumin,  
42 (1:10000 dilution; Sigma-Aldrich, UK) in a 1% NGS (company) PBS-TX solution following 90 min in a  
43 5% NGS solution. Sections were incubated overnight, washed in PBS-TX and incubated with the

1 relevant secondary antibody (goat anti-mouse A488 (Abcam, Cambridge, UK) in a 1% NGS 1:200 PBS-  
2 TX concentration.

### 3 *Microscopy and imaging*

4 Brain sections were imaged in brightfield at 20x magnification using a Leica slide scanner (Aperio  
5 AT2), visualised in Aperio ImageScope (version 12.3.2.8013). For fluorescence microscopy two  
6 systems were used. Either a Leica DM6000 B microscope with an attached Leica DFC350 FX digital  
7 camera with acquisition software (LAS AF image, Leica), or a Leica DM5000 B microscope with an  
8 attached Leica DFC310 FX digital camera. Images were adjusted for brightness and contrast in Corel  
9 Photo Paint X5 or FIJI (*'fiji is just imageJ'* freely available software available from  
10 <https://imagej.net/Fiji/Downloads>). Pixel density heat maps were generated in Fiji; images were  
11 converted to 8-bit and median filtered before applying a 16-colour LUT.

### 12 **Nomenclature**

13 Based on their recent guidance and clarification on the issue of how to consider the claustrum in  
14 relation to the endopiriform nuclei, we follow the classification of Smith and colleagues (2018) and  
15 consider a claustrum-endopiriform complex comprising the claustrum proper and the dorsal  
16 endopiriform nucleus (DEn), with the claustrum proper comprising dorsal (dCLA) and ventral (vCLA)  
17 subdivisions. In addition to atlas-based (Paxinos and Watson, 2005) definitions of the insular/orbital  
18 region, Nissl stained sections were used to delineate the border between the insular and orbital  
19 cortices. The lateral orbital cortex display prominent cytoarchitectonical differences from the insular  
20 cortex, such as a more densely packed layer 5 and a less sharp border between layers 2 and 3 (Van  
21 De Werd and Uylings, 2008).

### 22 **Results**

#### 23 *Anatomical boundary - Parvalbumin (PV) (IHC)*

24 *Coronal plane* – Neuropillar parvalbumin expression in the agranular insular cortex is characterized  
25 by attenuated expression with the exception of a densely-labeled fiber plexus in layer 5 (**Fig. 1A-D**).  
26 Contrasting dense expression of parvalbumin was present in the neuropil of the vCLA, distinctly  
27 revealing its core (Smith et al., 2018). Parvalbumin-immunoreactive neuron density was found to be  
28 sporadic but uniformly distributed across the insular cortex and vCLA with no discernible inter-  
29 laminar difference (**Fig. 1C-D**).

30

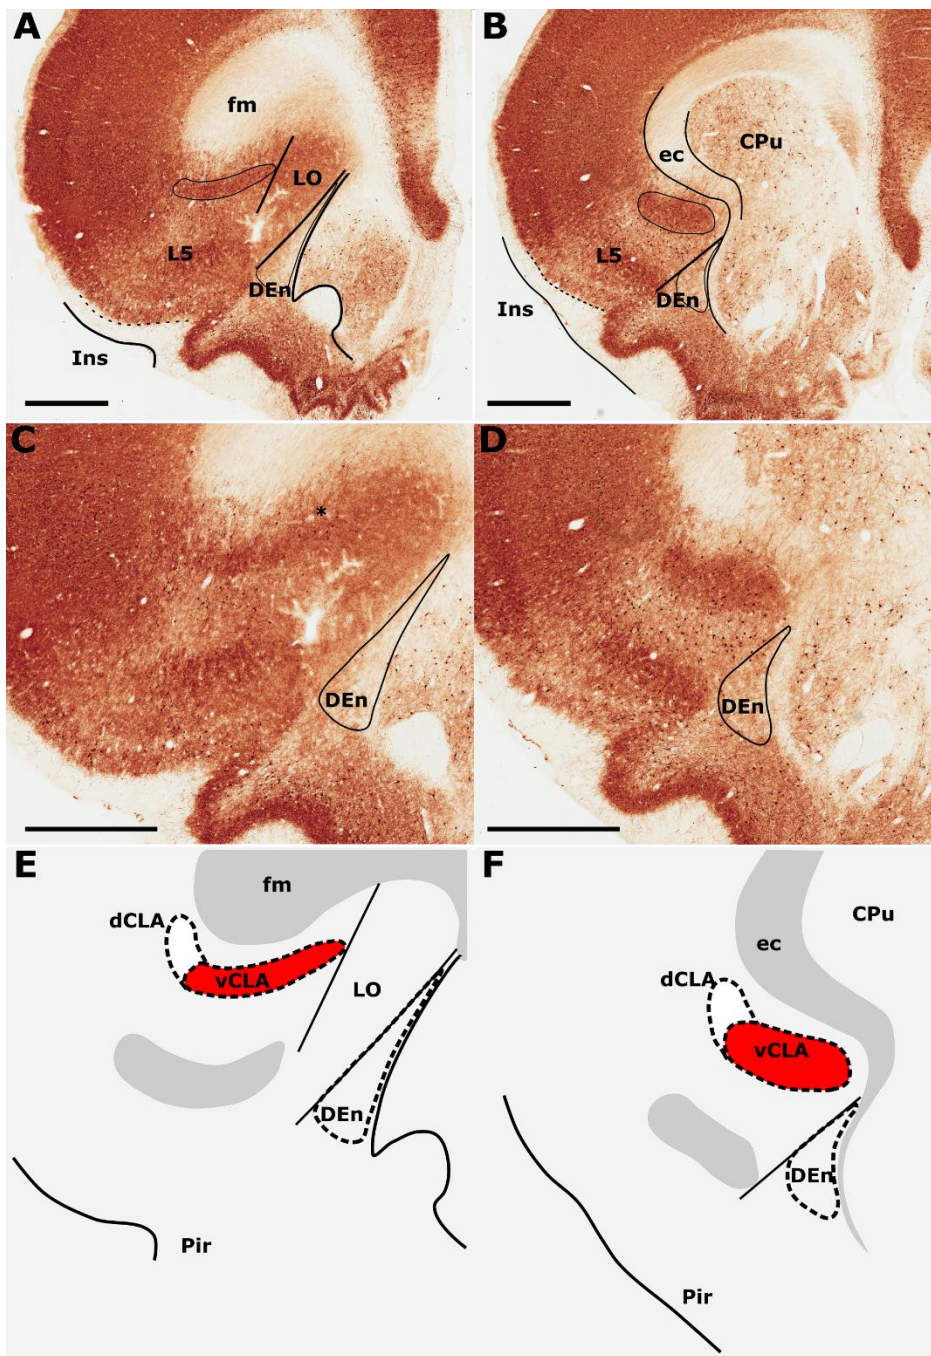

1

2 **Figure 1.** Differential parvalbumin expression in the insular region aids the delineation of the anatomical  
3 border of the claustrum. **A-D** show low (**A, B**) and high (**C, D**) magnification photomicrographs of parvalbumin  
4 immunoreactivity in brain sections rostral to the striatum (**A, C**) and at the level of the striatum (**B, D**). At the  
5 level of the striatum, dense expression of parvalbuminergic neuropil in the ventral claustrum (vCLA) contrasts  
6 with weaker expression in the neighbouring layer 6 of the insular cortex (**B, D**). Rostral to the striatum, dense  
7 parvalbuminergic neuropil is again observed deep to layer 6 of the insular cortex (Ins). Parvalbumin is  
8 expressed in the vCLA but does not allow for the delineation of the borders of the dorsal endopiriform nucleus  
9 (DEn), or the dorsal claustrum (dCLA) whose boundaries are estimated in **C-D**. Images **E-F** are schematic  
10 representations of **C-D**, respectively. Red fill represents the part of the complex that can be delineated using  
11 parvalbumin immunolocalization. Note in **A** and **C** that due to dense expression in the lateral orbital cortex  
12 (LO), the border between the medial extent of vCLA and LO is not easily determinable (asterisk). Abbreviations:  
13 CPu, caudate/putamen; ec, external capsule; fm, forceps minor of the corpus callosum; Pir, piriform cortex.  
14 Scale bars = 1000  $\mu$ m.

1 The insular cortex is bordered caudally by the peri- and ectorhinal cortices, while the rostral  
2 boundary of the insular cortex interfaces with the orbital cortices (**Fig. 1A, C**). Both orbital and rhinal  
3 cortices regions exhibit a uniformly higher density of parvalbumin neuropillar immunoreactivity  
4 across layers 4-6, albeit again with increased expression in layer 5. The transition of insular to  
5 peri/ectorhinal cortex matches closely with the caudal apex of the vCLA (**Fig. 2**), i.e. a continuous  
6 extension of claustral PV expression into the rhinal cortices was not present.

7 At the anterior horn of the neostriatum, parvalbumin expression in vCLA remained dense with no  
8 apparent reduction in cross-sectional area. At this coronal level (approximately represented by the  
9 +2.52 (from Bregma) plate in Paxinos and Watson, 2005), the ovoid cross-section of the claustrum is  
10 more horizontally oriented (**Fig. 3B-C**), being elongated within the arch of the external capsule.  
11 Immediately rostral to the anterior horn of the neostriatum, the putative vCLA was still present,  
12 maintaining its position beneath the forceps minor of the corpus callosum (within layer 6 of the  
13 insular cortex). Further rostrally, the lateral orbital cortex emerges to laterally displace both the  
14 insular cortex and the vCLA to a position progressively more ventrolateral with respect to the  
15 forceps minor (**Fig 1A, C**).

16 In our analyses of parvalbumin across multiple coronal cases, the vCLA was consistently found to  
17 extend approximately 500  $\mu\text{m}$  anterior to the anterior horn of the striatum. It is worthy of note that  
18 parvalbumin expression in the lateral orbital cortex was uniformly dense across its layers, such that  
19 the medial extent of the vCLA and the lateral orbital cortex appeared continuous; it was therefore  
20 difficult to determine this border between regions (**Fig. 1A, C**).

21



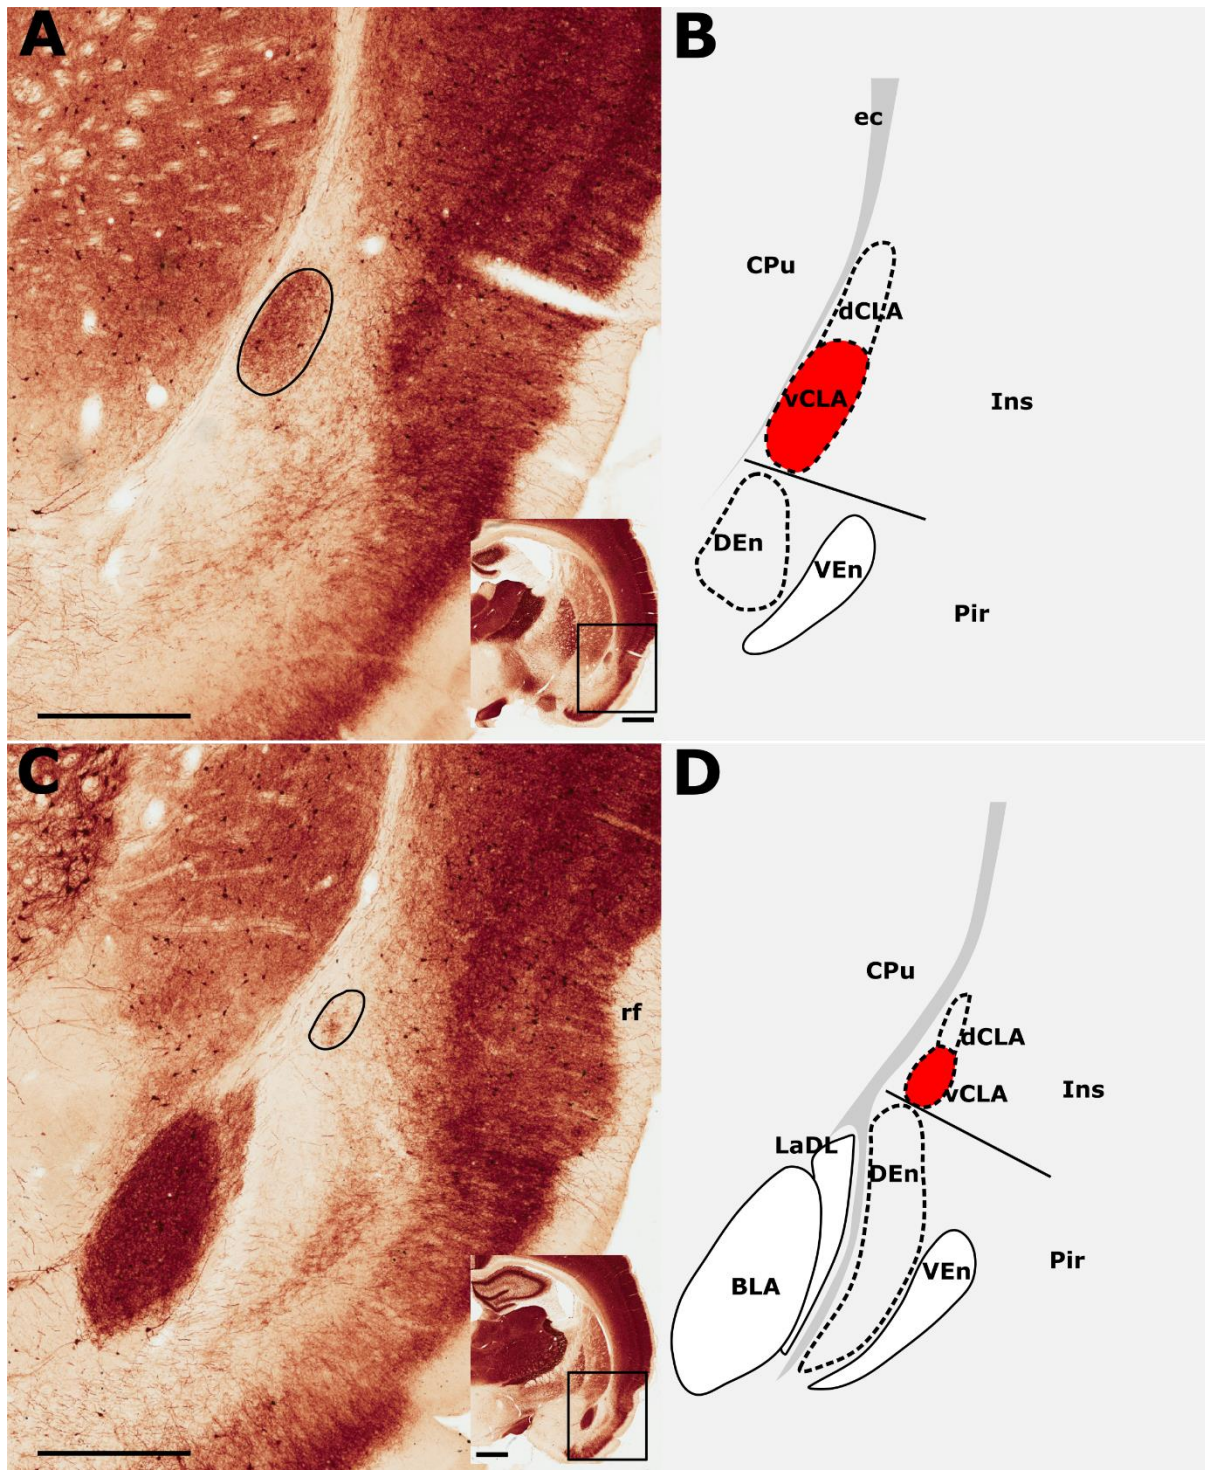

1

2 **Figure 2.** Parvalbumin expression showing the caudal extent of the ventral claustrum (vCLA). **A**, At a level  
3 approximately -1.8 mm from bregma (see low magnification inset), the claustrum is situated within layer 6 of  
4 the insular cortex (Ins). Note the absence of label in the dorsal claustrum (dCLA). **B**, Further caudally, at the  
5 level to the anterior amygdala complex (approximately -2.5 mm from bregma; see low magnification inset),  
6 the claustrum is significantly reduced in cross sectional area. The vCLA was not present caudal to this coronal  
7 section. Schematic representations of **A** and **C** are shown in **B** and **D**, respectively, with red fills representing  
8 parvalbumin expression in the claustrum. Abbreviations: BLA, basolateral amygdala nucleus; CPu, caudate  
9 putamen; DEn, dorsal endopiriform nucleus; ec, external capsule; Ins, insular cortex; LaDL, lateral amygdaloid  
10 nucleus, dorsolateral part; Pir, piriform cortex; VEn, ventral endopiriform nucleus. Scale bars in A, C = 500 μm;  
11 insets = 1000 μm.

1 *Horizontal (Axial) plane:* Relative to the midline, the position of the claustrum courses approximately  
2 2 mm medially from its caudal position at bregma to its rostral position at the anterior horn of the  
3 neostriatum (Paxinos and Watson, 2005), such that visualisation of the nucleus in the true-sagittal  
4 plane is only moderately beneficial in examining its continuity in the rostro-caudal axis. The dorsal-  
5 ventral position of claustrum, however, remains relatively consistent along this rostro-caudal extent  
6 such that visualisation of large portions of its continuity in the same plane of section is possible (e.g.  
7 2 mm in **Fig. 3A**). Retrograde tracer injections (Fluoro-gold) into the retrosplenial cortex combined  
8 with parvalbumin immunofluorescence in horizontal brain sections to further assess the rostral  
9 extent of vCLA. At striatal levels both parvalbumin expression and distributions of retrograde cell  
10 soma label clearly demarcated the claustral area. Beyond the anterior horn of the neostriatum, the  
11 vCLA arches upwards beneath the forceps minor. As a result, retrograde label and parvalbumin  
12 expression were observed in comparatively dorsal horizontal sections (**Fig. 3B-C**). At these dorsal  
13 levels, unlike in coronal sections in which contrast is present between dense claustral parvalbumin  
14 expression and weak expression in the immediately adjacent layer 6 of the insular cortex, the  
15 claustrum in horizontal sections is bordered by comparably dense cortical parvalbumin expression.  
16 At both striatal levels (**Fig. 3D-D<sup>ii</sup>**), and rostral to the striatum (**Fig. 3E-E<sup>ii</sup>** and **F-F<sup>ii</sup>**), retrogradely  
17 labelled cell bodies were present in the claustrum and in distributions that closely matched claustral  
18 parvalbumin expression.

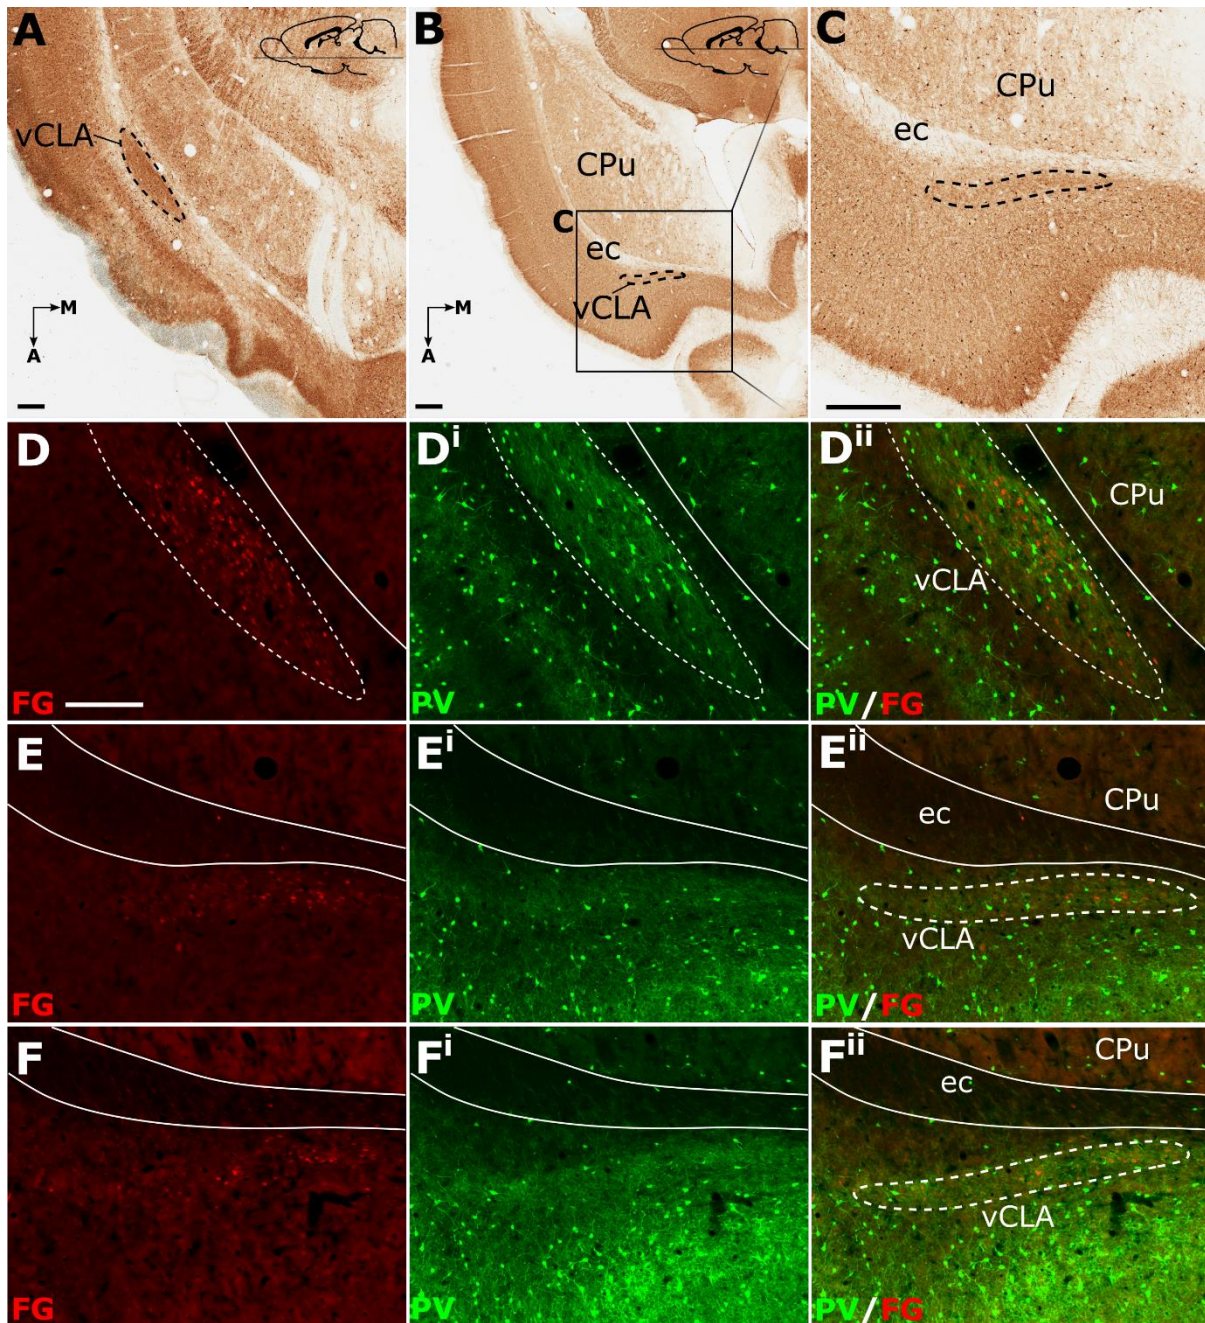

1

2 **Figure 3.** Parvalbumin expression in horizontal sections (A-D) provided complementary findings to those  
3 derived from coronal sections. Unlike coronal or sagittal series, the horizontal plane allows for visualization of  
4 much of the anterior-posterior extent of the ventral claustrum (vCLA) in a single section (A). Low magnification  
5 (B) and high magnification (C) images of the rostral extent of the vCLA (dashed line) in a comparatively more  
6 dorsal section than A. Dual fluorescence, combining parvalbumin expression (green) and retrograde labelling  
7 following injections of Fluoro-gold into the retrosplenial cortex (red), showed that, at striatal levels (D-D<sup>ii</sup>,  
8 corresponding to that in A), dense retrograde label overlaid claustral parvalbumin enrichment. Rostral to the  
9 striatum (E-E<sup>ii</sup> and F-F<sup>ii</sup>) retrograde labelled cell soma again overlaid parvalbumin enrichment corresponding to  
10 the claustrum, albeit with fewer retrogradely labelled soma and weaker parvalbumin expression. Scale bar in  
11 A-C = 500  $\mu$ m. Scale bar in D (applies to all fluorescent images) = 250  $\mu$ m.

12 *Anatomical boundary - Crystallin mu (Crym) (IHC)*

13 In findings that are consistent with reports in the mouse (Wang et al., 2017) and rat (Mathur et al.,  
14 2009), expression of Crym was dense in the insular cortex at striatal levels of the telencephalon but

1 markedly reduced in the vCLA (**Fig. 4C, G; Fig. 5**). In the putative dCLA, Crym-immunoreactive  
2 neuropil was reduced but to a lesser degree, while DEN was not discernible as the intensity of Crym  
3 immunoreactivity was similar to that in the neighbouring piriform cortex (**Fig. 5A-C**). Within the  
4 insular region, particularly high densities of Crym-immunoreactive cell bodies and neuropil were  
5 distributed around the circumference of the vCLA/dCLA complex. Within the core of the vCLA and  
6 dCLA, the distribution density of Crym-immunoreactive cell bodies was considerably reduced with  
7 just a few scattered ectopic Crym-positive soma (**Fig. 4E-H; Fig. 5**), although rostral to the striatum,  
8 the density of these 'ectopic' cortical soma was higher (**Fig. 4A-D**).

9

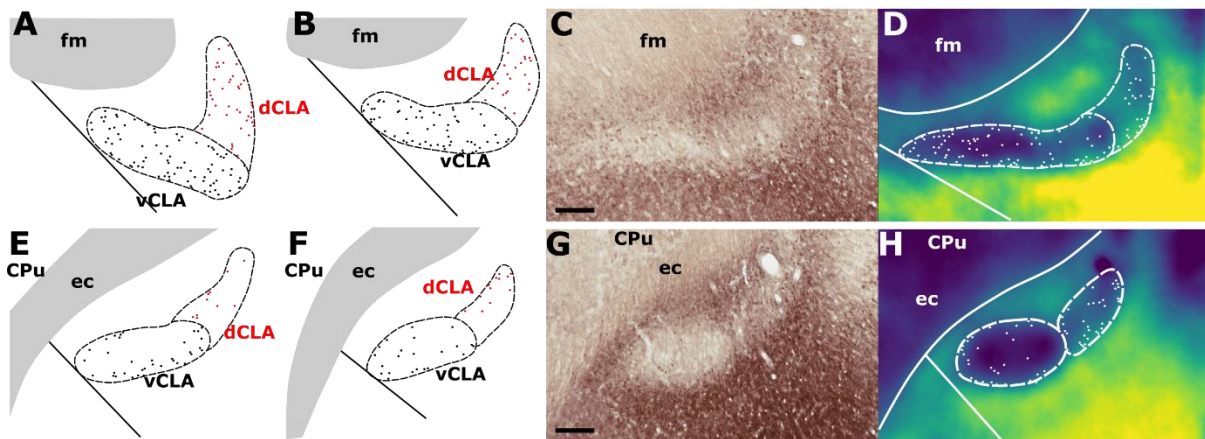

10

11 **Figure 4. A-B** Schematic representations of crystallin mu (Crym) delineated boundaries of the claustrum  
12 anterior to the striatum (CPu), highlighting the density of ectopic Crym-positive cell soma within the core of  
13 the ventral (vCLA; black) and dorsal claustrum (dCLA; red). **C** shows representative Crym staining in the  
14 claustrum/insular while **D** shows a pixel density heat map of **C** highlighting 1. The difficulty associated with  
15 determining the boundary between vCLA and dCLA; and 2. Cortical fibers crossing the claustrum to join the  
16 internal capsule. **E-H** show equivalent panels from striatal levels in which the number of ectopic Crym-positive  
17 cell soma is reduced and the boundary between vCLA and dCLA is more distinct. Abbreviations: ec, external  
18 capsule; fm, forceps minor of the corpus callosum. Scale bars = 200  $\mu$ m.

19 Consistent with past dual-immunofluorescence (Crym and parvalbumin) experiments (Mathur et al.,  
20 2009), differential expression of Crym in vCLA relative to the surrounding insular cortex delineated  
21 an anatomical boundary that closely matched that derived from our parvalbumin expression profile  
22 (**Fig. 5C-E; supplementary Fig. S1**), forming an increasingly elongated ovoid cross-section in the  
23 coronal plane towards the anterior horn of the neostriatum. Beyond the striatum, the Crym-based  
24 vCLA boundary formed a horizontally oriented ovoid beneath the forceps minor of the corpus  
25 callosum while further rostrally it was found to apex ventrolaterally beneath the forceps minor  
26 (while remaining confined to the boundary of the insular cortex; **Fig. 5D-E**). Unlike the parvalbumin  
27 expression profile, however, the Crym profile enabled a clear delineation of the boundary between  
28 the vCLA (weak Crym expression) and the lateral orbital cortex (dense Crym expression), with the  
29 finding that vCLA did not extend into the lateral orbital cortex but remained confined to the  
30 boundaries of the insular region (**Fig. 5A-B**). Crym expression was also found to be reduced in dCLA  
31 (**Fig. 5**), which meant that the precise vCLA-dCLA transitional boundary was not clear; an issue that  
32 was also contributed to by the presence of Crym-immunoreactive fibers ascending to the internal  
33 capsule (Coizet et al., 2017; **Fig. 5A<sup>i</sup>-B<sup>i</sup>**).

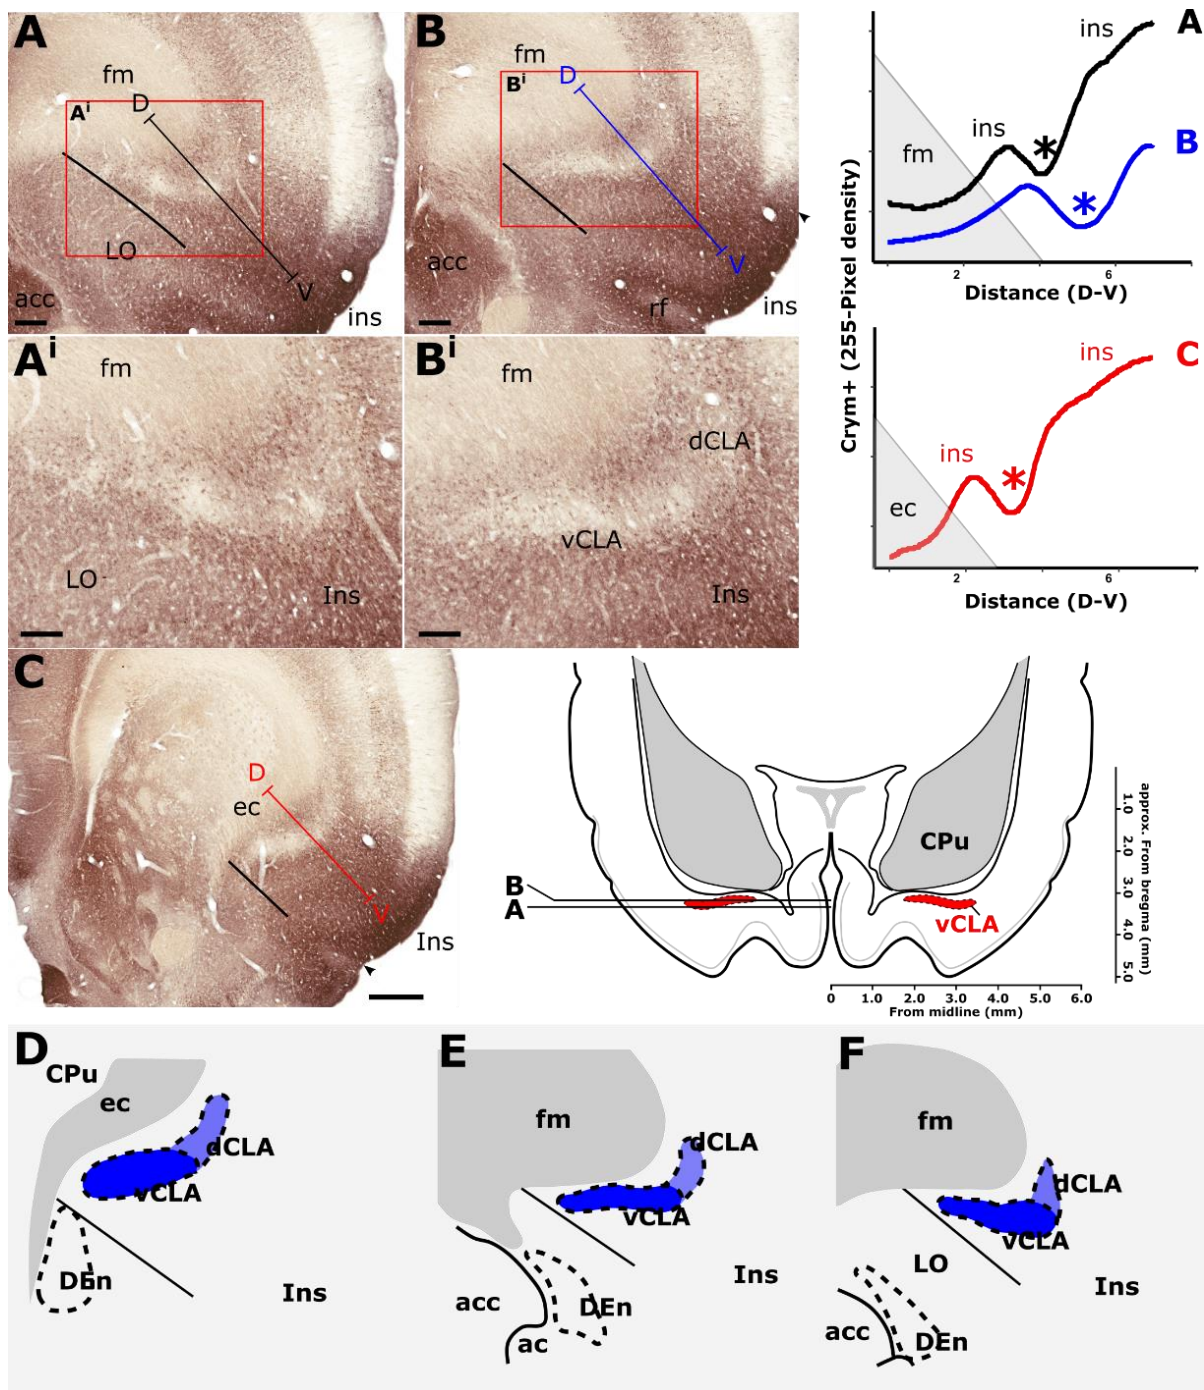

1  
2  
3  
4  
5  
6  
7  
8  
9  
10  
11

**Figure 5.** Crystallin mu (Crym) is a cortical marker that is expressed particularly strongly in the insular cortex. In contrast, expression in the claustrum is considerably reduced providing contrast for delineation of the anatomical boundary of the claustrum. Pixel density plots through the insular cortex at both striatal levels (C; red), and rostral to the striatum (A, B; black and blue, respectively) show cortical peaks either side of a claustral trough (asterisks). Central schematic diagram shows approximate coronal levels of photomicrographs in A-B. D-F: Schematic representations of Crym-based delineation of the claustrum-endopiriform complex. Delineation of the dorsal endopiriform nucleus (DEn) is not possible using Crym, however, vCLA, and to a lesser degree dCLA are (See also Fig. 3). Abbreviations: acc, nucleus accumbens; CPu, caudate/putamen; ec, external capsule; fm, forceps minor of the corpus callosum; Ins, insular cortex; LO, lateral orbital cortex. Scale bars in A, B = 300  $\mu$ m; A', B' = 200  $\mu$ m; C = 600  $\mu$ m.

12 *Anatomical boundary - Gng2 (IHC)*

1 Neuropillar Gng2 immunoreactivity was found to be densely distributed throughout the insular  
2 cortex (**Fig. 6A-D**). The densest Gng2-immunoreactivity was present in the superficial-most layers  
3 and was reduced in layers 5 and 6 which contrasted with the dense vCLA immunoreactivity (**Fig. 6A-**  
4 **D**). Dense expression was observed in layer 2 of the piriform cortex but weak expression in layer 3  
5 again provided contrast with denser Gng2 immunoreactivity in DEn (**Fig. 6A-D**).

6 Gng2 immunoreactivity delineated a vCLA boundary that was consistent with both parvalbumin and  
7 Crym, albeit with a less-well pronounced margin (**Fig. 6E-F**). Indeed, manual registration of serial  
8 sections that had been immunohistochemically (DAB) reacted for either Crym or Gng2, revealed  
9 expression profiles of vCLA and dCLA Gng2 enrichment that closely matched (at all claustral levels)  
10 the region of Crym attenuation in the corresponding section (see supplementary **Fig. S2**). At striatal  
11 levels, Gng2 enrichment in DEn was continuous ventrally with vCLA although with denser expression  
12 in vCLA (**Fig. 6B, D**), so that the boundary between the two nuclei at the piriform/insular boundary  
13 was distinct. Rostral to the anterior horn of the striatum, DEn was no longer continuous with vCLA,  
14 and the two regions became progressively separated by the emergence of the lateral orbital  
15 cortices, i.e. the extent of vCLA and DEn remained confined to insular and piriform cortices,  
16 respectively (**Fig. 6A, C, E**). At this anterior-posterior level, Gng2 expression in vCLA formed a  
17 horizontally-oriented ovoid beneath the forceps minor of the corpus callosum with the dCLA arching  
18 around its ventrolateral border. As with PV and Crym, further rostrally, vCLA became more restricted  
19 in cross-sectional area and situated more laterally with respect to the forceps minor.

20

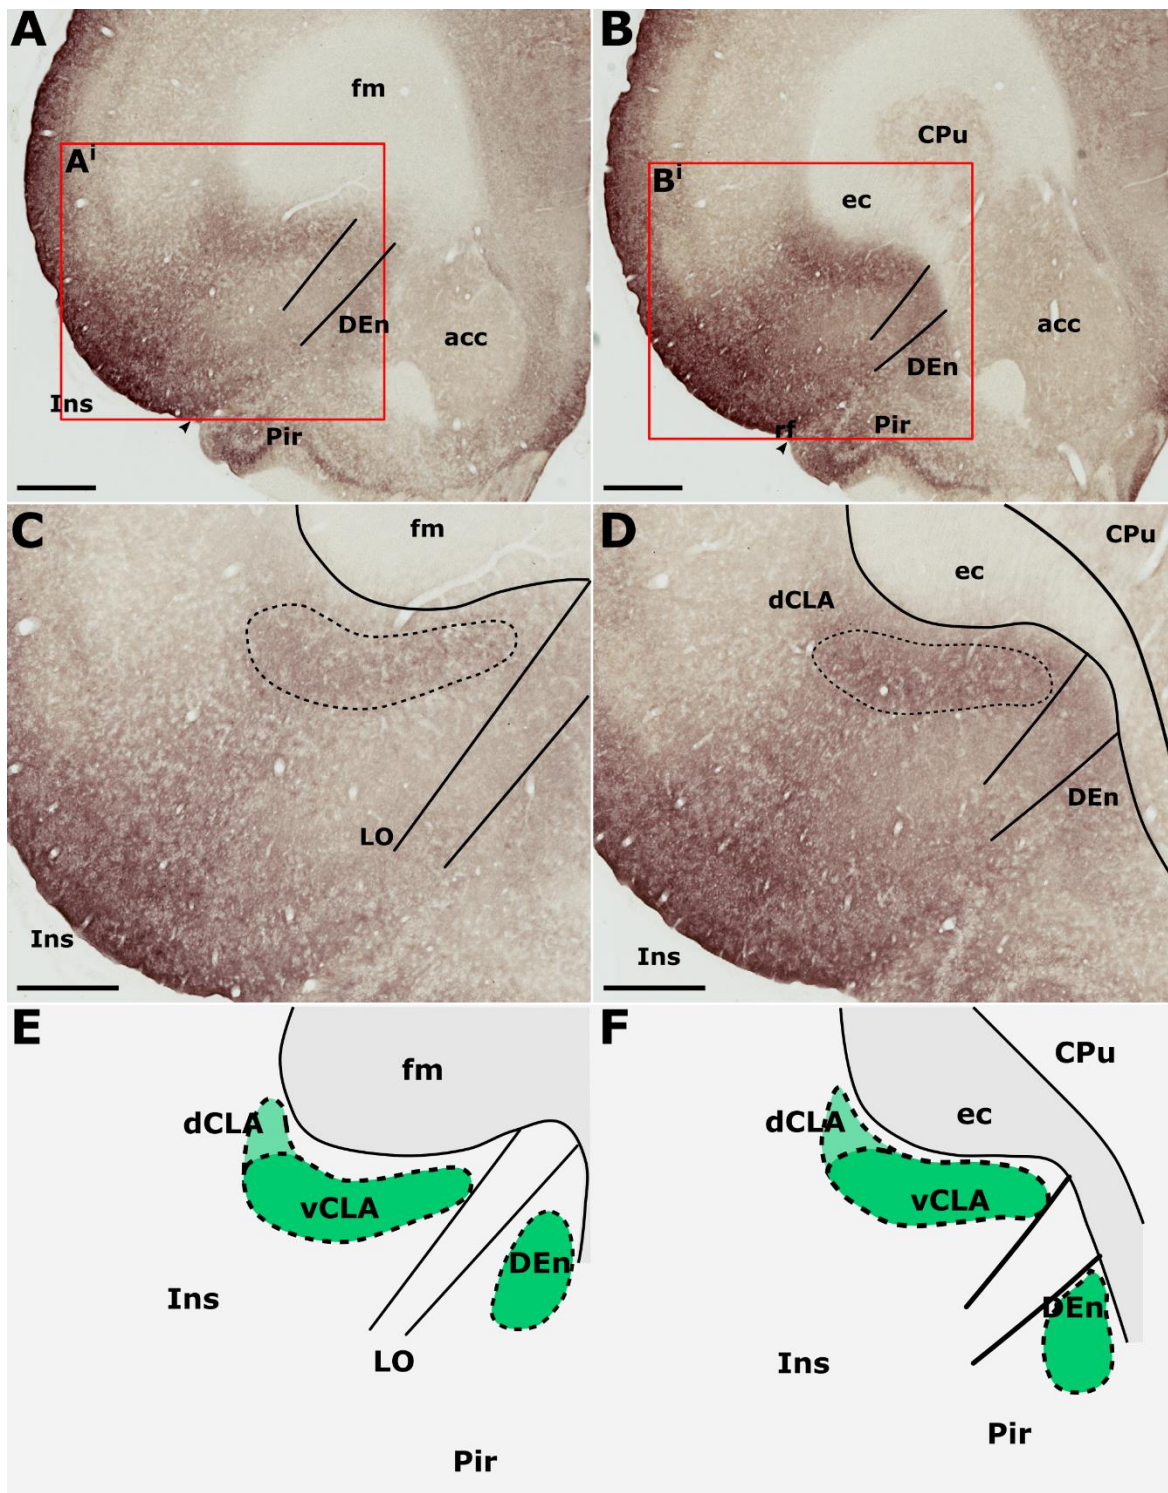

1

2 **Figure 6.** Guanine nucleotide binding protein (G protein), gamma 2 (Gng2), is expressed throughout the  
3 insular cortex but relatively weakly in layers 5/6. At striatal levels (**B, D**), dense expression is observed in the  
4 ventral claustrum (vCLA) and dorsal endopiriform nucleus (DEn). Expression in the dorsal claustrum (dCLA) but  
5 it is relatively weaker (**D**). The same distribution of expression is evident anterior to the striatum (**A, C**) albeit  
6 with weaker expression throughout the claustrum-endopiriform complex. Note in A and C, the separation of  
7 DEn from vCLA with the emergence of the lateral orbital cortex (LO). **E-F** are schematic representations of  
8 Gng2 expression (green) rostral to the striatum and at striatal levels, respectively. Abbreviations: acc, nucleus  
9 accumbens; CPu, caudate/putamen; ec, external capsule; fm, forceps minor of the corpus callosum; Ins, insular  
10 cortex; Pir, piriform cortex. Scale bars in A, B = 800  $\mu$ m; C, D = 500  $\mu$ m.

1 *Anatomical boundary - Neuronal tracer injections*

2 Pressure injections of either retrograde (FB, CtB or FG) or anterograde (viral) neuronal tracers were  
3 made targeting either the retrosplenial or anterior cingulate cortices, revealing a consistently dense  
4 pattern of label along the rostro-caudal extent of vCLA (see **Table 1**).

5

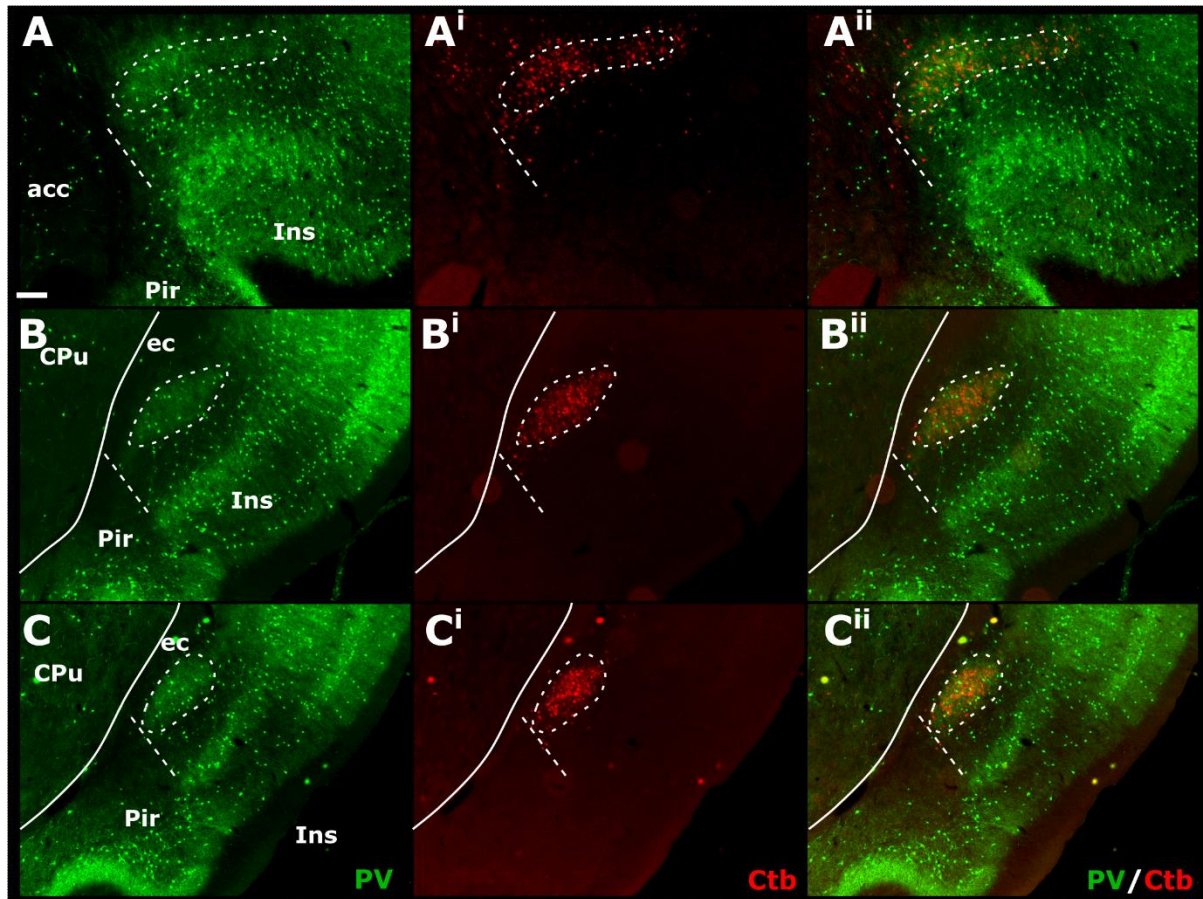

6

7 **Figure 7.** Tracer injections of the non-toxin subunit B of cholera toxin (CtB) within the retrosplenial cortex  
8 resulted in dense cell soma label in the ipsilateral claustrum in a distribution that overlapped with claustral  
9 parvalbumin expression (for a comparable case using Fluoro-gold, see supplementary **Fig. S4** and for injections  
10 sites see supplementary **Fig. S5**). At anterior-posterior (AP) levels rostral to the anterior horn of the  
11 neostriatum (CPu, A-A<sup>ii</sup>) parvalbumin and CtB label delineated a claustral border (white dashed line) that was  
12 horizontally oriented within the arch of the forceps minor of the corpus callosum (fm). At rostral and mid-  
13 striatal AP levels (B-B<sup>ii</sup> and C-C<sup>ii</sup>, respectively), the claustral border was more vertically oriented alongside the  
14 external capsule (ec). Abbreviations: Scale bar = 200  $\mu$ m.

15 Cases in which multiple FB, FG or CtB injections were made unilaterally along the extent of the  
16 retrosplenial cortex or anterior cingulate cortex (more confined injections) resulted in dense  
17 retrograde label in the ipsilateral claustrum. Although weak, retrograde label was present in the  
18 claustrum of the contralateral hemisphere at both striatal levels, as well as rostral to the striatum  
19 (see supplementary **Fig. S3**). The distribution of retrogradely labeled cell bodies was confined to the  
20 ventral claustrum, i.e., it did not extend into the dorsal claustrum, or ventrally to the DEN.  
21 Significantly, the distribution of retrograde label in vCLA extended beyond the anterior horn of the  
22 neostriatum, delineating a boundary consistent with that determined from IHC analyses (**Fig. 7A-A<sup>ii</sup>**).  
23 In cases involving retrograde injections targeting the anterior cingulate cortex, dense cell labelling



1 was present in the claustrum between 0.4-0.6 mm rostral to the anterior tip of the striatum. The cell  
2 labelling that resulted from injections in the retrosplenial cortex extended to comparable rostral  
3 levels, although with varying cell density.

4 Injections of anterogradely transported pAAV-CaMKIIa-hM4D(Gi)-Mcherry (serotype 5) confined to  
5 the anterior cingulate cortex (bilaterally in three cases; see **Table 1**), resulted in dense fibre/terminal  
6 labeling along the rostro-caudal extent of the claustrum (**Fig. 8**), revealing a rostral extension of the  
7 claustrum beyond the anterior horn of the neostriatum that closely matched the distribution of  
8 retrograde label observed in CtB and FB cases. In these cases, however, the dense “plexus” of fibre  
9 label in the claustrum (deep to the insular cortex) was continuous with more widespread, diffuse  
10 fibre labelling in the orbitofrontal cortex which, rostral to the level of claustrum, centred in a fibre  
11 plexus in the deepest lamina of the lateral orbital cortex together (including more superficial  
12 labelling; **Fig. 8A<sub>1</sub>-A<sub>3</sub>** and **B<sub>1</sub>-B<sub>3</sub>**). This orbital portion correspond to what has previously been  
13 suggested to constitute the rostral portion of the claustrum (Paxinos and Watson, 2005). In two  
14 further cases, injection of pAAV-CaMKIIa-EGFP (serotype 5) into the retrosplenial cortex  
15 (unilaterally) resulted in a more restricted fibre distribution, as no dense fibre label was present in  
16 the lateral orbital cortex.

17 In cases in which either retrograde (CtB, FG or FB), or anterograde (pAAV-CaMKIIa-hM4D(Gi)-  
18 Mcherry) injections were made into the retrosplenial cortex (CtB) or anterior cingulate cortex (viral  
19 tracer and FB), we reacted the sections for parvalbumin (see **Fig. 8** for the anterograde tracing). In  
20 these dual- fluorescence cases, immunolocalization distributions of tracer label again closely  
21 matched parvalbumin neuropillar immunoreactivity in the vCLA. The distribution of retrograde  
22 labelled cell bodies in CtB and FB cases, as well as anterograde fibre/terminal label in DREADDs-  
23 mCherry cases, rostral to the anterior horn of the neostriatum, was closely aligned with our  
24 parvalbumin-based definition of the rostral claustral area, as described above. Interestingly, the fibre  
25 label in the deep layer 6 of the lateral orbital cortex, which resulted from anterograde tracer  
26 injections in the anterior cingulate (see above), was shown to a large extent to overlap with a  
27 portion *devoid* of parvalbumin neuropillar label (**Fig. 8A<sub>1-3</sub>**).

28

29

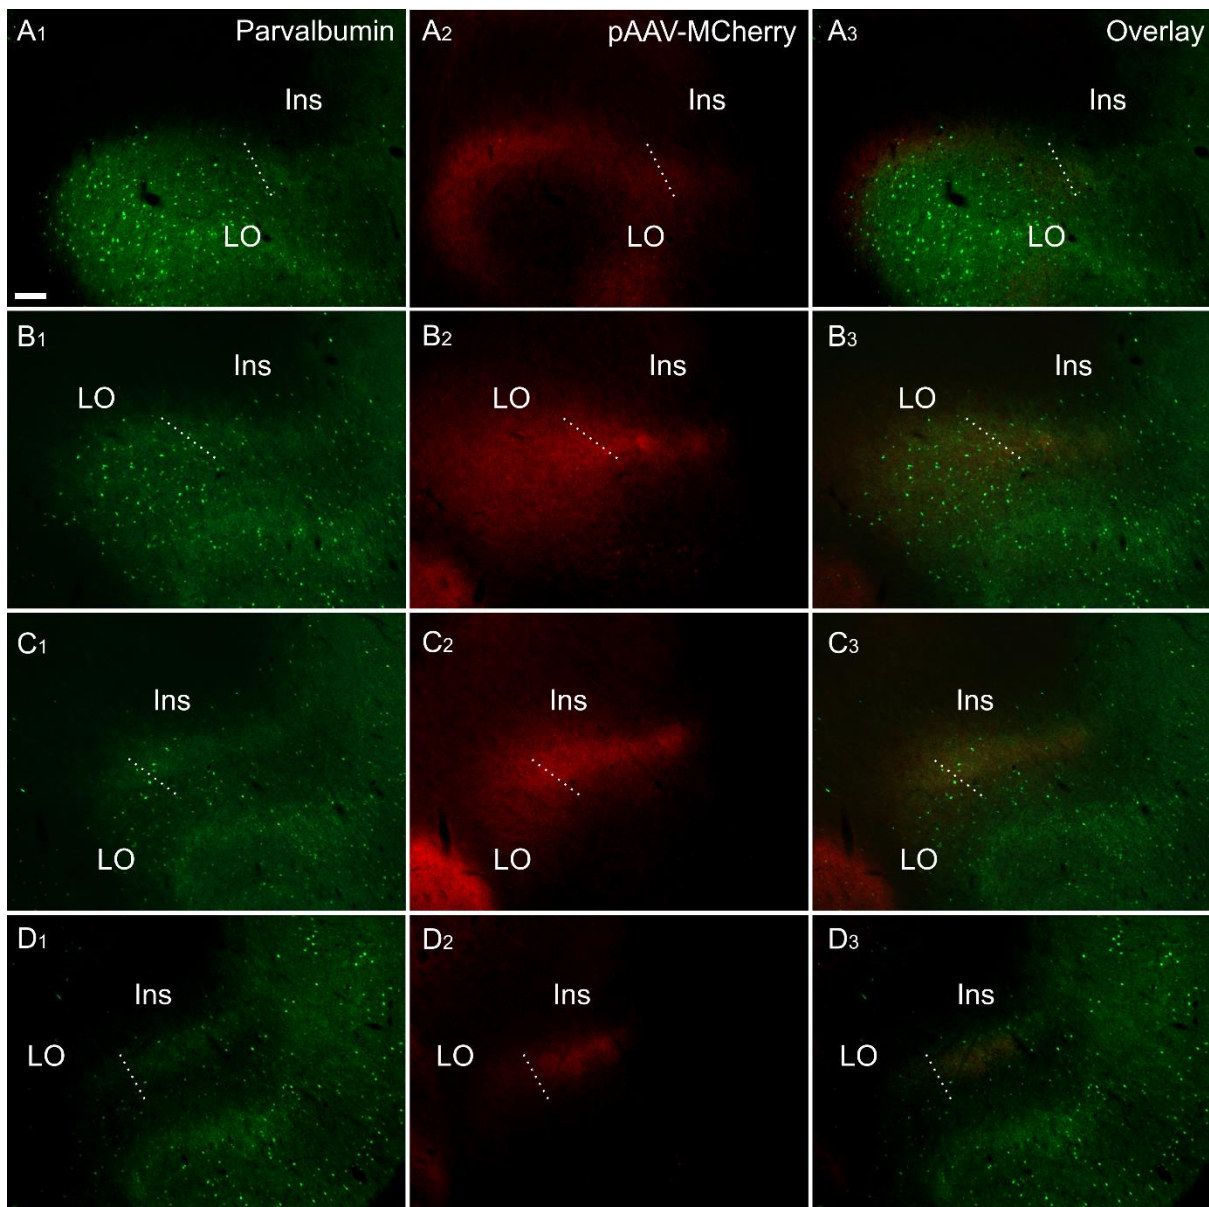

1

2 **Figure 8.** Fibre label resulting from multiple injections (bilateral) of an anterograde viral tracer (pAAV-  
3 CaMKIIa-hM4D(Gi)-Mcherry) in the anterior cingulate cortex (case 219#3; column 2) shown in sections co-  
4 labelled for parvalbumin (column 1). The four rows (A-D) show photomicrographs of the claustrum at four  
5 anteroposterior levels separated by 200  $\mu$ m. Row D is at the most rostral portion of striatum, Rows C-A rostral  
6 to striatum. Terminal fibre label co-localized with parvalbumin in a plexus that extends at least two sections  
7 rostral to striatum. The dotted line indicates the border between lateral orbital and insular cortices.  
8 Abbreviations: Ins, insular cortex; LO, lateral orbital cortex. "pAAV-MCherry" is an abbreviation for pAAV-  
9 CaMKIIa-hM4D(Gi)-Mcherry. Scale bars = 200  $\mu$ m.

#### 10 *Anatomical boundary - thalamocortical connectivity*

11 Retrograde tracer injections (FB or CtB; see **Table 1**), centred in the nucleus reuniens/rhomboid  
12 nuclei of the midline thalamus, resulted in dense retrograde label in the insular cortex. A comparable  
13 pattern of labelling was seen following an injection centred in the mediodorsal, paraventricular and  
14 centromedial thalamic nuclei (**Fig. 9**; see also supplementary **Fig. S5**).

15 At striatal levels, a band of retrogradely labelled cell bodies was present in the insular cortex  
16 surrounding the claustrum, both superficial, i.e. juxtaposed to the external capsule) and deep to the

1 claustrum. Within the claustrum core, very few retrogradely labelled cell bodies were present,  
2 particularly at more septal/striatal levels. Anterior to the striatum, the distribution of cortical label  
3 outlined a region of attenuated label that closely matched that which was defined by the differential  
4 expression of cortical tracers, Gng2, parvalbumin and Crym (**Fig. 9**). In two of these cases, stained  
5 sections for parvalbumin confirmed that the region of attenuated label was indeed claustrum. In  
6 these same two cases overlays with cresyl stained section confirmed that the border between the  
7 lateral orbital and the insular cortices co-localise with the parvalbumin based definition of  
8 claustrum.

9

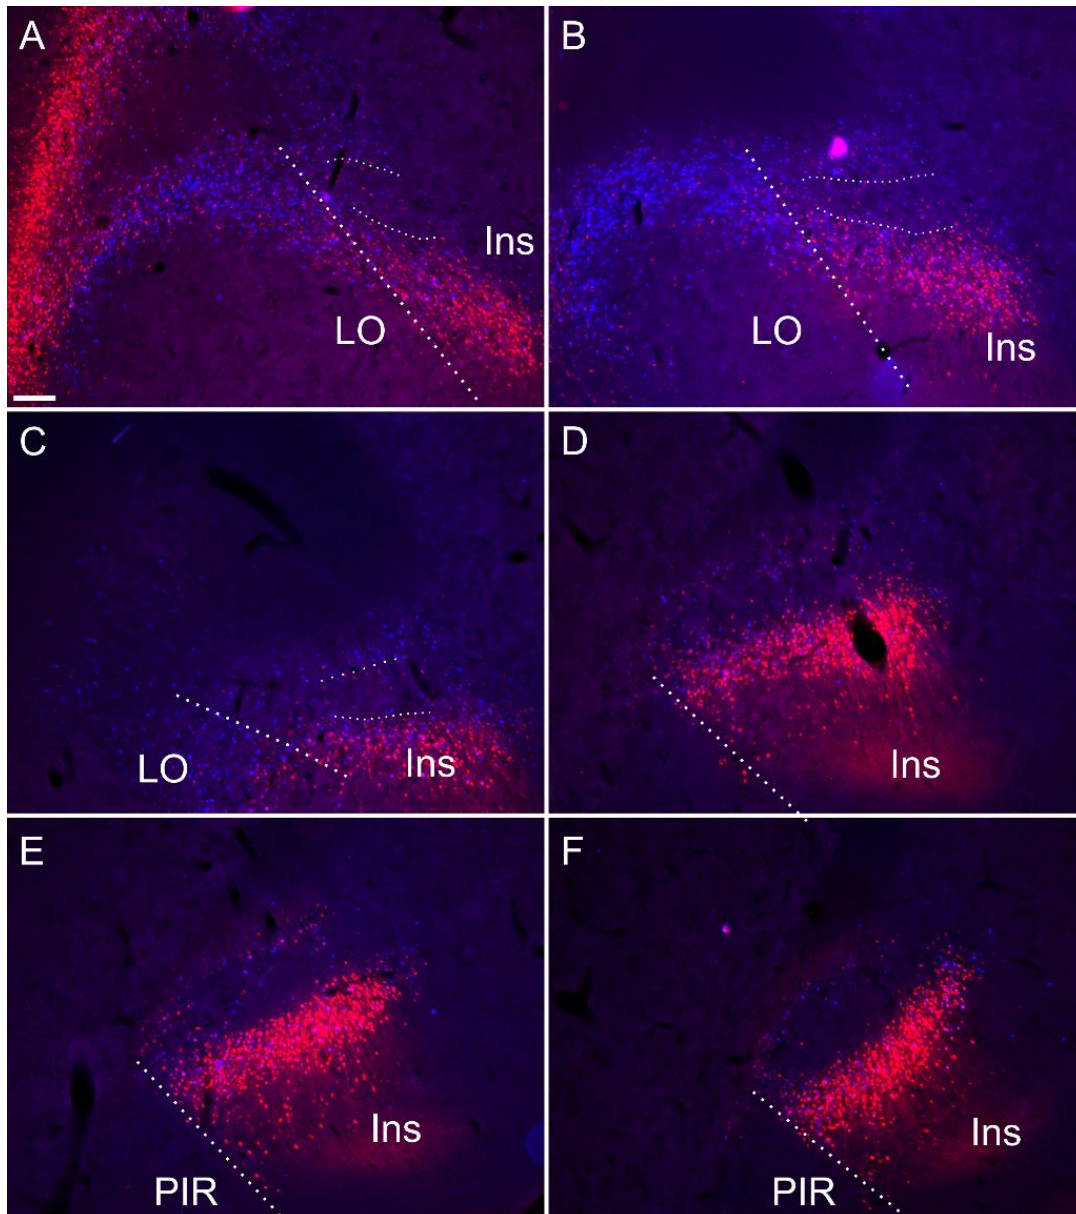

10

11 **Figure 9.** Retrograde soma label, in the insular and orbital cortices, resulting from cholera-toxin b (CtB, red)  
12 and Fast Blue (FB, blue) injections centred in mediadorsal/paraventricular/centromedial thalamic nuclei (Ctb)  
13 and nucleus reuniens/rhomboid (blue; see supplementary **Fig. S5** for injection sites corresponding to this  
14 case). The dense soma label encapsulates the claustral area where cell label is substantially attenuated. Thick  
15 dashed lines demarcate the border between the orbitofrontal and insular cortices, while the thin dashed lines

1 designate the approximate borders of the claustrum at rostral levels. Ins, insular cortex; LO, lateral orbital  
2 cortex; PIR, piriform cortex. Scale bars = 200  $\mu$ m.

### 3 Discussion

4 A consensus on the anatomical boundary of the claustrum-endopiriform complex is important for  
5 establishing its functional role and, on a more immediate and practical level, for both the  
6 interpretation of, e.g. anatomical studies, as well as in the verification of electrode placements in  
7 electrophysiological studies.

8 Our primary finding is that the expression profiles of three claustral marker genes, Gng2 (**Fig. 6**),  
9 parvalbumin (**Fig. 1**) and Crym (**Fig. 5**), as well as cortical (**Figs. 7-8**) and thalamic (**Fig. 9**) tracing data,  
10 demonstrate that the anatomical boundary of the rat claustrum extends approximately 500  $\mu$ m  
11 rostral to the anterior horn of the neostriatum, remaining confined throughout its rostro-caudal  
12 span to layer 6 of the insular cortex (**Fig. 10**). Our findings relating to the *caudal* extent of the  
13 claustrum in the rat are in close accordance with atlas-based delineations (e.g. Paxinos and Watson,  
14 2005), where vCLA and dCLA terminate at the level of the transition of insular to rhinal cortices (**Fig.**  
15 **2**). Caudal to this coronal level, the claustral differential expression profiles of Crym, Gng2, and  
16 parvalbumin within the deep insular cortex were no longer apparent.

17 In findings that are consistent with reports both in the mouse (Wang et al., 2017) and rat (Mathur et  
18 al., 2009), expression of Crym was dense in the insular cortex. At striatal levels, dense distributions  
19 of Crym-immunoreactive cell bodies and neuropil were distributed around the circumference of the  
20 claustrum, very clearly delineating the cortical shell surrounding the claustrum as described  
21 previously (Mathur et al., 2009). Within the core of the vCLA, Crym-immunoreactivity (both cell  
22 bodies and neuropil), was all but absent except for a handful of Crym-immunoreactive (putative)  
23 ectopic cortical cell bodies. Conversely, Gng2 and parvalbumin expression was enriched in the core  
24 of the vCLA and delineated a boundary that closely matched that which was negatively outlined by  
25 the Crym expression profile. Mathur and colleagues (2009) established, through dual-  
26 immunofluorescence, that parvalbumin expression in the claustrum revealed an anatomical  
27 boundary of the claustrum that closely matched that shown by Crym (**Fig. 10**). Using manual  
28 registration of serial sections, we have shown that Crym and Gng2 outline a similarly consistent  
29 nuclear boundary, providing further validation of these markers (Supplementary **Fig. S2**). Retrograde  
30 cortical and thalamic tracing experiments, as well as anterograde cortical tracing cases provided data  
31 that was highly complementary to our IHC findings. The rostral claustrum has been suggested to be  
32 positioned deep to the ventral and lateral orbital cortices (Paxinos and Watson, 2005). We observed  
33 that fibres from the anterior cingulate cortex terminated densely in this area but, importantly, that  
34 this fibre plexus did not co-localize with the parvalbumin label, thereby further consolidating the  
35 idea that this area is cortical and not claustral.

36 Numerous studies have reported dense connectivity between the claustrum and the thalamus in the  
37 rat (Herkenham, 1978a; McKenna and Vertes, 2004; Vertes et al., 2006, 2012; Yoshida et al., 2005;  
38 Zhang et al., 2001). Given the cortical shell surrounding the claustrum core and the presence of  
39 ectopic cortical neurons throughout its rostral-caudal extent (Mathur et al., 2009), there is  
40 uncertainty as to whether these reported connections are accurate. Our data seems to support the  
41 case presented initially by Mathur and colleagues (2009) that the cortex immediately surrounding  
42 the claustrum shares subcortical connectivity but the claustrum itself does not. Our retrograde  
43 thalamic injections included the three thalamic nuclei that have been suggested to receive claustral  
44 afferents (Erickson et al., 2004; Herkenham, 1978b; McKenna and Vertes, 2004; Vertes et al., 2012;  
45 Zhang et al., 2001) We did observe scattered thalamic projecting cells in the claustrum area,

1 especially at rostral level. However, as the same pattern was seen in Crym stained sections, i.e.  
2 ectopic insular cortical neurons were occasionally scattered within the core of the claustrum, with  
3 the same rostro-caudal distribution, it is most likely that our retrograde labelled cells were in fact  
4 cortical cells.

5 In certain respects, our findings contradict those of Mathur and colleagues (2009), whose  
6 conclusions prompted a reassessment of the atlas-based anatomical boundary of the claustrum to  
7 one which: 1. Did not extend rostral to the anterior horn of the neostriatum, and 2. Was not  
8 juxtaposed to the external capsule but was instead surrounded by a cortical shell.

9 In their study, Mathur and colleagues also examined the expression of parvalbumin, Gng2, and Crym  
10 in the rat, using the same primary antibodies and similar dilutions. However, as most data were  
11 shown as immunofluorescence label, and not immunohistochemistry, it is possible that our  
12 immunohistochemical approach was more sensitive to identifying the slightly weaker frontal signal  
13 (in the Gng2 stain). Additionally, in their analysis of Gng2 and parvalbumin expression,  
14 photomicrographs depict an absence of label in the region ventral to the forceps minor of the corpus  
15 callosum, but one that is at an extreme rostral level in which this region is orbital, not insular  
16 (Mathur et al., 2009). The level depicted represents the rostral-most extent of the insular cortex at  
17 which level it is situated more laterally, i.e. outside of the presented field of view. In the same study,  
18 neuronal tract tracing was used in combination with parvalbumin immunofluorescent localisation  
19 and, in this instance, images were centered over parvalbumin immunofluorescence in the orbital  
20 cortices, in which no retrograde label was observed. It would, therefore, seem to be the case that  
21 Mathur and colleagues (2009) were correct in their disagreement with the atlas of Paxinos and  
22 Watson (2005), in that the claustrum is not situated within the orbital cortex at rostral levels, but  
23 mistaken in their conclusion that the claustrum was, therefore, only present at striatal levels. The  
24 consequence of these contradictory findings has been the development of a trend in many recent  
25 studies to include a methodological note stating that *analyses of claustral labelling did not extend*  
26 *beyond the most rostral coronal section that contained striatum due to the reported absence of Gng2*  
27 *expression in these regions* contributing to an incomplete understanding of the claustrum.

28 As mentioned, the differential expression of Gng2 and Crym in the frontal extension of the claustrum  
29 becomes less accentuated. It would seem to be the case that towards the rostral apex of the  
30 claustrum, the density of ectopic cortical neurons within the core of the claustrum increases,  
31 constituting something of a claustro-cortical transition (**Fig. 4** and supplementary **Fig. 1**), but it is also  
32 worthy of note that at these rostral levels, ascending axon bundles from neurons within the  
33 insular/orbital cortices enter the forceps minor of the corpus callosum in a path that bisects the  
34 claustrum (Coizet et al., 2017). These bundles would appear to reduce both the uniformity of Crym  
35 attenuation and the clarity of the gene marker-defined boundary.

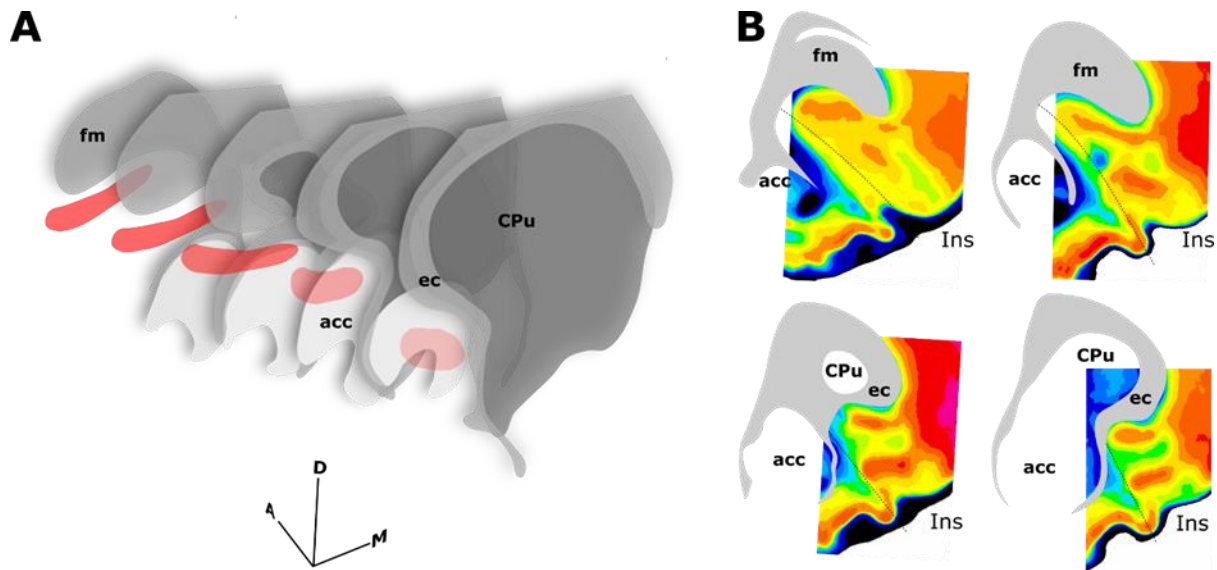

1

2 **Figure 10.** Schematics summarising the rostral extent of the anatomical boundary of the claustrum in the rat.  
3 Expression of parvalbumin, crystallin mu and Gng2, along with anterograde and retrograde tracing of claustrum-  
4 cortical connectivity, and retrograde tracing of corticothalamic connectivity provided highly complimentary  
5 definitions of the boundary outlined in A-B. **A**, 3-dimensional representation of parvalbumin expression (red)  
6 in the ventral claustrum from caudal striatal (CPu) anterior-posterior levels (front) to rostral levels anterior to  
7 the striatum (back). Note the change in orientation of the long axis of the claustrum as it follows the arch of  
8 the forceps minor of the corpus callosum (fm) and the external capsule (ec). **B**, Pixel density-based heatmaps  
9 (warm colours represent high expression) of parvalbumin expression in sections anterior to the striatum  
10 (upper) and at the level of the striatum (lower), reinforcing the extent and continuity rostral to the striatum.  
11 Abbreviations: acc, nucleus accumbens; Ins, insular cortex.

12 Parvalbumin expression in the rodent CLA-DEN complex is confined to the vCLA (Smith et al., 2018),  
13 avoiding the DEN and the dCLA. As a result, the distribution of parvalbumin provides an important  
14 reference in determining the extent of gng2 and Crym expression within the CLA-EN complex and, of  
15 relevance here, the relative components of the rostral extent of the complex. At the anterior horn of  
16 the neostriatum, insular and piriform cortices are juxtaposed with vCLA embedded within layer 6 of  
17 the insular cortex and DEN within the deepest layer 3 of the piriform cortex. At this level, vCLA and  
18 DEN are continuous. Further rostrally, the emergence of the orbital cortex separates insular and  
19 piriform cortices and, therefore, vCLA from DEN. Meanwhile, vCLA and dCLA remain continuous  
20 throughout the caudo-rostral extent of the complex. Rostral to the striatum, the vCLA/dCLA complex  
21 becomes situated progressively more ventrolaterally, relative to the forceps minor of the corpus  
22 callosum.

## 23 **Conclusions**

24 Using neuroanatomical tracing and the expression profiles of two genes that are widely accepted to  
25 be differentially expressed in the striatal claustrum, we report here that, contrary to previous  
26 reports, the rostral extent of the claustrum in the rat extends anterior to the rostral apex of the  
27 striatum. Our combined tracing and gene-marker based data represent a unified view of the position  
28 of the rostral claustrum. The functions of claustrum are matter of continuing investigation, with cells  
29 that appear to code for aspects of extended space present in the rat claustrum (Jankowski and  
30 O'Mara, 2015), somewhat akin to the place cells and other spatial cells found in the hippocampal  
31 formation and other related areas (Grieves and Jeffery, 2015). The seeming absence of either  
32 thalamic or hippocampal inputs suggest that the spatial coding in claustrum observed by Jankowski  
33 and O'Mara (2015) is likely to be cortical in origin, perhaps originating from a combination of spatial

1 inputs from, e.g., grid cells of the entorhinal cortex (Hafting et al., 2005), and other inputs from  
2 regions such as parieto-insular vestibular cortex (e.g. Rancz et al., 2015). The relative cortically-  
3 encapsulated inputs and outputs of claustrum we describe here would support this proposition.

#### 4 **Conflict of Interest**

5 The authors declare that the research was conducted in the absence of any commercial or financial  
6 relationships that could be construed as a potential conflict of interest.

#### 7 **Author Contributions**

8 CD, MM, SOM and MJ conceived and designed the experiments; CD, MM, BF, EB, ML performed the  
9 experiments; CD, MM, ML, SOM analysed the data; CD, MM wrote the manuscript with  
10 contributions from SOM, BF, MJ and JA; EB and JA contributed data or analysis tools.

#### 11 **Funding**

12 This work was supported by Science Foundation Ireland grant SFI 13/IA/2014 and a Joint Senior  
13 Investigator Award made by the Wellcome Trust to S.M.O.M. and J.P.A. #103722/Z14/Z

#### 14 **Acknowledgements**

15 The authors would like to thank Dr Lisa Kinnavane for her assistance with a retrograde tracing  
16 experiment.

#### 17 **References**

- 19 Baizer, J. S., Sherwood, C. C., Noonan, M., Hof, P. R., Mathur, B. N., Innocenti, G., et al. (2014).  
20 Comparative organization of the claustrum: what does structure tell us about function? *Front.*  
21 *Syst. Neurosci.* doi:10.3389/fnsys.2014.00117.
- 22 Buchanan, K. J., and Johnson, J. I. (2011). Diversity of spatial relationships of the claustrum and insula  
23 in branches of the mammalian radiation. *Ann. N. Y. Acad. Sci.* 1225, E30–E63.  
24 doi:10.1111/j.1749-6632.2011.06022.x.
- 25 Coizet, V., Heilbronner, S. R., Carcenac, C., Maily, P., Lehman, J. F., Savasta, M., et al. (2017).  
26 Organization of the Anterior Limb of the Internal Capsule in the Rat. *J. Neurosci.* 37, 2539–  
27 2554. doi:10.1523/JNEUROSCI.3304-16.2017.
- 28 Dillingham, C. M., Jankowski, M. M., Chandra, R., Frost, B. E., and O’Mara, S. M. (2017). The  
29 claustrum: Considerations regarding its anatomy, functions and a programme for research.  
30 *Brain Neurosci. Adv.* 1, 239821281771896. doi:10.1177/2398212817718962.
- 31 Druga, R., Chen, S., and Bentivoglio, M. Parvalbumin and calbindin in the rat claustrum: an  
32 immunocytochemical study combined with retrograde tracing frontoparietal cortex. *J. Chem.*  
33 *Neuroanat.* 6, 399–406.
- 34 Erickson, S. L., Melchitzky, D. S., and Lewis, D. A. (2004). Subcortical afferents to the lateral  
35 mediodorsal thalamus in cynomolgus monkeys. *Neuroscience* 129, 675–690.  
36 doi:10.1016/J.NEUROSCIENCE.2004.08.016.
- 37 Hafting, T., Fyhn, M., Molden, S., Moser, M.-B., and Moser, E. I. (2005). Microstructure of a spatial  
38 map in the entorhinal cortex. *Nature* 436, 801–806. doi:10.1038/nature03721.
- 39 Herkenham, M. (1978a). The connections of the nucleus reuniens thalami: Evidence for a direct  
40 thalamo-hippocampal pathway in the rat. *J. Comp. Neurol.* 177, 589–609.  
41 doi:10.1002/cne.901770405.
- 42 Herkenham, M. (1978b). The connections of the nucleus reuniens thalami: Evidence for a direct  
43 thalamo-hippocampal pathway in the rat. *J. Comp. Neurol.* 177, 589–609.

- 1           doi:10.1002/cne.901770405.
- 2   Hinova-Palova, D. V., Edelstein, L., Landzhov, B. V., Braak, E., Malinova, L. G., Minkov, M., et al.  
3           (2014a). Parvalbumin-immunoreactive neurons in the human claustrum. *Brain Struct. Funct.*  
4           doi:10.1007/s00429-013-0603-x.
- 5   Hinova-Palova, D. V., Landzhov, B., Dzhambazova, E., Minkov, M., Edelstein, L., Malinova, L., et al.  
6           (2014b). Neuropeptide Y immunoreactivity in the cat claustrum: A light- and electron-  
7           microscopic investigation. *J. Chem. Neuroanat.* 61–62, 107–119.  
8           doi:10.1016/j.jchemneu.2014.08.007.
- 9   Jankowski, M. M., and O’Mara, S. M. (2015). Dynamics of place, boundary and object encoding in rat  
10           anterior claustrum. *Front. Behav. Neurosci.* 9, 250. doi:10.3389/fnbeh.2015.00250.
- 11   Kim, J., Matney, C. J., Roth, R. H., and Brown, S. P. (2016). Synaptic Organization of the Neuronal  
12           Circuits of the Claustrum. *J. Neurosci.* 36, 773–84. doi:10.1523/JNEUROSCI.3643-15.2016.
- 13   Kitanishi, T., and Matsuo, N. (2016). Organization of the claustrum-to-entorhinal cortical connection  
14           in mice. *J. Neurosci.*, 1360–16. doi:10.1523/JNEUROSCI.1360-16.2016.
- 15   Mathiasen, M. L., Amin, E., Nelson, A. J. D., Dillingham, C. M., O’Mara, S. M., and Aggleton, J. P.  
16           (2019). Separate cortical and hippocampal cell populations target the rat nucleus reuniens and  
17           mammillary bodies. *Eur. J. Neurosci.* doi:10.1111/ejn.14341.
- 18   Mathur, B. N. (2014). The claustrum in review. *Front. Syst. Neurosci.* 8, 48.  
19           doi:10.3389/fnsys.2014.00048.
- 20   Mathur, B. N., Caprioli, R. M., and Deutch, A. Y. (2009). Proteomic analysis illuminates a novel  
21           structural definition of the claustrum and insula. *Cereb. Cortex* 19, 2372–9.  
22           doi:10.1093/cercor/bhn253.
- 23   McKenna, J. T., and Vertes, R. P. (2004). Afferent projections to nucleus reuniens of the thalamus. *J.*  
24           *Comp. Neurol.* 480, 115–142. doi:10.1002/cne.20342.
- 25   Patzke, N., Innocenti, G. M., and Manger, P. R. (2014). The claustrum of the ferret: afferent and  
26           efferent connections to lower and higher order visual cortical areas. *Front. Syst. Neurosci.* 8, 31.  
27           doi:10.3389/fnsys.2014.00031.
- 28   Paxinos, G., and Watson, C. (2005). The rat brain in stereotaxic coordinates: Elsevier Academic Press.  
29           *San Diego.*
- 30   Pirone, A., Cozzi, B., Edelstein, L., Peruffo, A., Lenzi, C., Quilici, F., et al. (2012). Topography of Gng2-  
31           and NetrinG2-expression suggests an insular origin of the human claustrum. *PLoS One* 7,  
32           e44745. doi:10.1371/journal.pone.0044745.
- 33   Pirone, A., Magliaro, C., Giannessi, E., and Ahluwalia, A. (2015). Parvalbumin expression in the  
34           claustrum of the adult dog. An immunohistochemical and topographical study with  
35           comparative notes on the structure of the nucleus. *J. Chem. Neuroanat.* 64–65, 33–42.  
36           doi:10.1016/j.jchemneu.2015.02.004.
- 37   Puelles, L., Ayad, A., Alonso, A., Sandoval, J. E., Martínez-de-la-Torre, M., Medina, L., et al. (2016).  
38           Selective early expression of the orphan nuclear receptor *Nr4a2* identifies the claustrum  
39           homolog in the avian mesopallium: Impact on sauropsidian/mammalian pallium comparisons.  
40           *J. Comp. Neurol.* 524, 665–703. doi:10.1002/cne.23902.
- 41   Qadir, H., Krimmel, S. R., Mu, C., Pouloupoulos, A., Seminowicz, D. A., and Mathur, B. N. (2018).  
42           Structural Connectivity of the Anterior Cingulate Cortex, Claustrum, and the Anterior Insula of  
43           the Mouse. *Front. Neuroanat.* 12, 100. doi:10.3389/fnana.2018.00100.



- 1 Rahman, F. E., and Baizer, J. S. (2007). Neurochemically defined cell types in the claustrum of the cat.  
2 *Brain Res.* 1159, 94–111. doi:10.1016/j.brainres.2007.05.011.
- 3 Rancz, E. A., Moya, J., Drawitsch, F., Brichta, A. M., Canals, S., and Margrie, T. W. (2015). Widespread  
4 Vestibular Activation of the Rodent Cortex. *J. Neurosci.* 35, 5926–5934.  
5 doi:10.1523/JNEUROSCI.1869-14.2015.
- 6 Remedios, R., Logothetis, N. K., and Kayser, C. (2010). Unimodal responses prevail within the  
7 multisensory claustrum. *J. Neurosci.* 30, 12902–7. doi:10.1523/JNEUROSCI.2937-10.2010.
- 8 Sanchez-Vives, M. V., Deutch, A. Y., and Mathur, B. N. (2015). Editorial: The Claustrum: charting a way  
9 forward for the brain’s most mysterious nucleus. *Front. Syst. Neurosci.*  
10 doi:10.3389/fnsys.2015.00103.
- 11 Smith, J. B., and Alloway, K. D. (2010a). Functional specificity of claustrum connections in the rat:  
12 interhemispheric communication between specific parts of motor cortex. *J. Neurosci.* 30,  
13 16832–44. doi:10.1523/JNEUROSCI.4438-10.2010.
- 14 Smith, J. B., and Alloway, K. D. (2010b). Functional specificity of claustrum connections in the rat:  
15 interhemispheric communication between specific parts of motor cortex. *J. Neurosci.* 30, 16832–  
16 16844. doi:10.1523/JNEUROSCI.4438-10.2010.
- 17 Smith, J. B., Alloway, K. D., Hof, P. R., Orman, R., Reser, D. H., Watakabe, A., et al. (2018). The  
18 relationship between the claustrum and endopiriform nucleus: a perspective towards  
19 consensus on cross-species homology. *J. Comp. Neurol.* 0. doi:10.1002/cne.24537.
- 20 Smith, J. B., Alloway, K. D., Mathur, B. N., Garraghty, P. E., and Sherk, H. (2014). Interhemispheric  
21 claustral circuits coordinate sensory and motor cortical areas that regulate exploratory  
22 behaviors. *Front. Syst. Neurosci.* 8, 93. doi:10.3389/fnsys.2014.00093.
- 23 Smythies, J. R., Edelstein, L. R., and Ramachandran, V. S. (2014). Hypotheses Relating to the Function  
24 of the Claustrum. *Clastrum Struct. Funct. Clin. Neurosci.* 6, 299–352. doi:10.1016/B978-0-12-  
25 404566-8.00013-1.
- 26 Van De Werd, H. J. J. M., and Uylings, H. B. M. (2008). The rat orbital and agranular insular prefrontal  
27 cortical areas: a cytoarchitectonic and chemoarchitectonic study. *Brain Struct. Funct.* 212, 387–  
28 401. doi:10.1007/s00429-007-0164-y.
- 29 Vertes, R. P., Hoover, W. B., Do Valle, A. C., Sherman, A., and Rodriguez, J. J. (2006). Efferent  
30 projections of reuniens and rhomboid nuclei of the thalamus in the rat. *J. Comp. Neurol.* 499,  
31 768–96. doi:10.1002/cne.21135.
- 32 Vertes, R. P., Hoover, W. B., and Rodriguez, J. J. (2012). Projections of the central medial nucleus of  
33 the thalamus in the rat: Node in cortical, striatal and limbic forebrain circuitry. *Neuroscience*  
34 219, 120–136. doi:10.1016/J.NEUROSCIENCE.2012.04.067.
- 35 Wang, Q., Ng, L., Harris, J. A., Feng, D., Li, Y., Royall, J. J., et al. (2017). Organization of the  
36 connections between claustrum and cortex in the mouse. *J. Comp. Neurol.* 525, 1317–1346.  
37 doi:10.1002/cne.24047.
- 38 Watakabe, A. (2017). In situ hybridization analyses of claustrum-enriched genes in marmosets. *J.*  
39 *Comp. Neurol.* 525, 1442–1458. doi:10.1002/cne.24021.
- 40 White, M. G., Cody, P. A., Bubser, M., Wang, H.-D., Deutch, A. Y., and Mathur, B. N. (2017). Cortical  
41 hierarchy governs rat claustrum-cortical circuit organization. *J. Comp. Neurol.* 525, 1347–1362.  
42 doi:10.1002/cne.23970.
- 43 Yoshida, K., McCormack, S., España, R. A., Crocker, A., and Scammell, T. E. (2005). Afferents to the

- 1            orexin neurons of the rat brain. *J. Comp. Neurol.* 494, 845–861. doi:10.1002/cne.20859.
- 2    Zhang, X., Hannesson, D. K., Saucier, D. M., Wallace, a E., Howland, J., and Corcoran, M. E. (2001).  
3            Susceptibility to kindling and neuronal connections of the anterior claustrum. *J. Neurosci.* 21,  
4            3674–3687.
- 5    Zingg, B., Dong, H.-W., Tao, H. W., and Zhang, L. I. (2018). Input-output organization of the mouse  
6            claustrum. *J. Comp. Neurol.* 526, 2428–2443. doi:10.1002/cne.24502.

7  
8  
9  
10  
11  
12  
13  
14  
15  
16  
17  
18  
19  
20  
21  
22  
23  
24  
25  
26  
27  
28  
29  
30  
31  
32  
33

- 1 **Table 1.** An overview of the cases used in the study, including details of the type, and target of
- 2 cortical and thalamic neuronal tracer injections.

| Cases                                            | Injection sites              | Tracer                        | Immunofluorescence |
|--------------------------------------------------|------------------------------|-------------------------------|--------------------|
| <b>Thalamic injections (retrograde tracers)</b>  |                              |                               |                    |
| 215#4                                            | MD, PV, CM<br>RE/Rh          | CtB<br>FB                     |                    |
| 208#9                                            | RE                           | FB                            |                    |
| 207#2                                            | RE/Rh (SMT, IAM)             | FB                            | Parvalbumin,       |
| 207#4                                            | RE/Rh (CM, IMD)              | FB                            |                    |
| 207#7                                            | RE (PVT, CM, IAM)            | FB                            |                    |
| 209#10                                           | RE/posterior<br>hypothalamus | CtB                           |                    |
| 207#1                                            | RE                           | FB                            | Parvalbumin        |
| <b>Cortical injections (retrograde tracers)</b>  |                              |                               |                    |
| 199#29                                           | RSC                          | FB                            |                    |
| 225#4                                            | RSC                          | CtB                           |                    |
| 225#12                                           | RSC                          | CtB                           |                    |
| 223#1                                            | RSC                          | CtB                           |                    |
| 198#12                                           | RSC                          | FB                            |                    |
| 199#29                                           | RSC                          | FB                            |                    |
| 225#1                                            | RSC                          | CtB                           | Parvalbumin        |
| 225#1                                            | Cg                           | FB                            | Parvalbumin        |
| 222#10                                           | RSC                          | CtB                           |                    |
| 222#10                                           | Cg                           | FB                            |                    |
| 223#5                                            | Cg                           | FB                            |                    |
| 223#26                                           | Cg                           | CtB                           |                    |
| FGrsc#1                                          | RSC                          | FG                            | Parvalbumin        |
| FGrsc#2                                          | RSC                          | FG                            | Parvalbumin        |
| LK#1                                             | RSC                          | CtB                           | Parvalbumin        |
| <b>Cortical injections (anterograde tracers)</b> |                              |                               |                    |
| 224#30                                           | RSC                          | pAAV-CaMKIIa-EGFP             |                    |
| 224#29                                           | RSC                          | pAAV-CaMKIIa-EGFP             |                    |
| 219#3                                            | Cg                           | pAAV-CaMKIIa-hM4D(Gi)-Mcherry | Parvalbumin        |
| 219#17                                           | Cg                           | pAAV-CaMKIIa-hM4D(Gi)-Mcherry |                    |
| 219#21                                           | Cg                           | pAAV-CaMKIIa-hM4D(Gi)-Mcherry |                    |
| <b>Immunohistochemistry</b>                      |                              |                               |                    |
|                                                  | <b>Marker</b>                | <b>Plane</b>                  |                    |
| HPCLA1                                           | Crym, Gng2                   | Coronal                       |                    |
| HPCLA2                                           | Crym, Gng2                   | Coronal                       |                    |
| RCLA1                                            | Crym, Gng2                   | Coronal                       |                    |
| RCLA2                                            | Gng2                         | Coronal                       |                    |

|         |            |                    |  |
|---------|------------|--------------------|--|
| RCLA3   | Gng2, Crym | Coronal            |  |
| RCLA4   | Gng2       | Coronal            |  |
| RCLA5   |            | Coronal            |  |
| SHPC1   | PV         | Coronal            |  |
| BiFlex1 | PV, Crym   | Coronal            |  |
| BiRCLA1 | PV, Crym   | Coronal            |  |
| BiRCLA2 | PV         | Coronal            |  |
| BiRCLA3 | PV, Crym   | Coronal            |  |
| CLArsc2 | PV         | Horizontal (axial) |  |
| WK2     | PV         | Horizontal (axial) |  |
| LH1     | Gng2       | Coronal            |  |
| LH2     | Gng2       | Coronal            |  |

1

2

### 3 Supplementary Figures

4

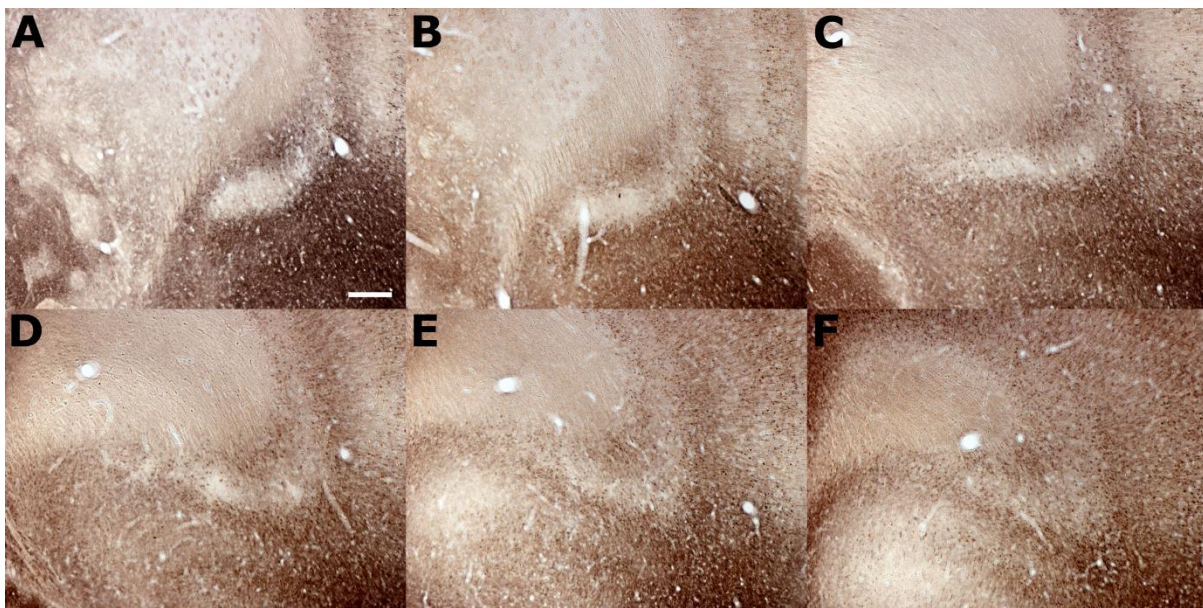

5

6 **Figure S1.** Photomicrographs of a sequential 1-in-4 series reacted against crystallin mu (Crym) ranging from a  
7 mid-striatal anterior-posterior level (A), to the rostral peak of the striatum (C) and up to a rostral aspect of the  
8 claustrum approximately 600  $\mu\text{m}$  anterior to the striatum. Scale bar = 300  $\mu\text{m}$

9

10

11

12

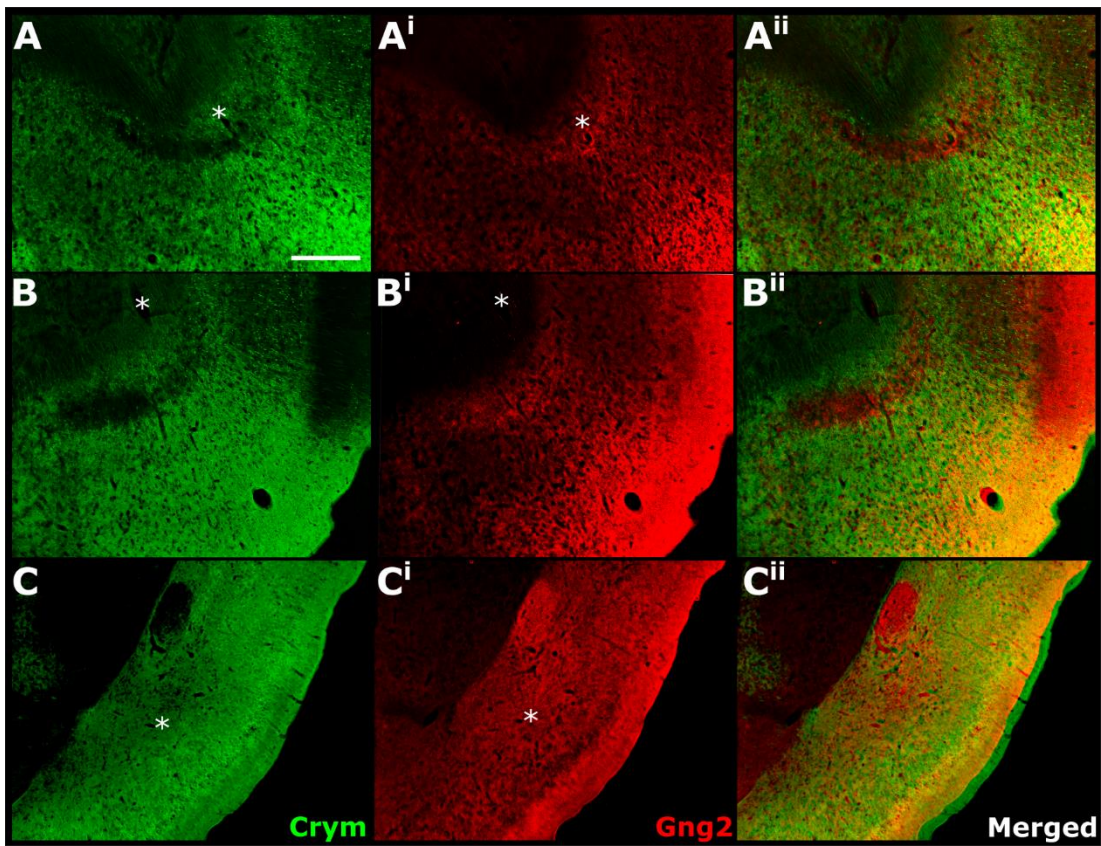

1

2

3

4

5

6

7

8

9

10

**Figure S2.** Images from sequential immunohistochemically (DAB) stained crystallin mu (Crym; **A-C**) and Gng2 (**A<sup>i</sup>-C<sup>i</sup>**) sections that have been converted to 8-bit and pseudo-coloured in green and red, respectively. Merged Images were aligned and manually registered using landmarks (asterisks) to assess the overlap between attenuated Crym staining in the claustrum and enriched Gng2 expression. **A-A<sup>ii</sup>** shows overlap between Crym and Gng2 rostral to the striatum; **B-B<sup>ii</sup>** shows overlap at the rostral apex of the striatum and **C-C<sup>ii</sup>** show overlap at a mid-striatal anterior posterior level. In all cases, Gng2 enrichment and Crym attenuation delineated a consistent claustrum border. Scale bar (applies to all) = 500  $\mu$ m.

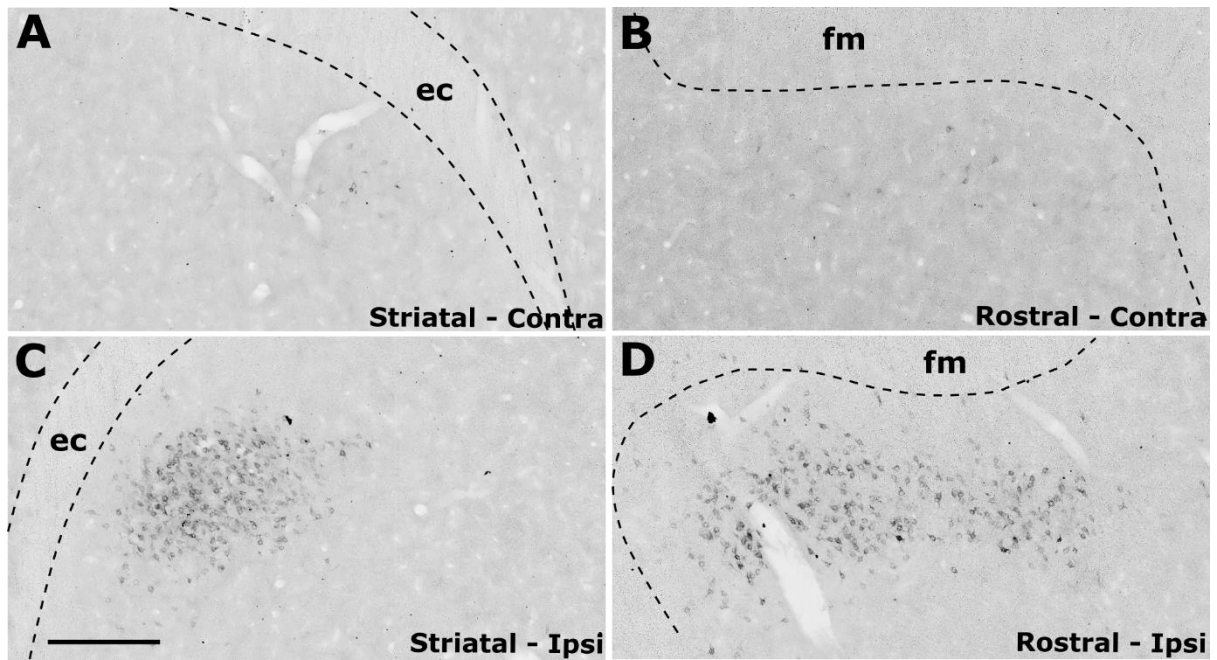

1

2

3

4

5

6

7

8

**Figure S3.** Unilateral (right hemisphere) retrograde Tracer injections (Fluoro-gold; FG) targeting the retrosplenial cortex resulted in labelled cell soma in the claustrum both at striatal anterior-posterior (AP) levels (C-D) as well as rostral to the striatum (A-B) in a distribution that closely matched parvalbumin expression in the claustrum (See dual fluorescent label (FG and parvalbumin) from the same case in Fig. 8). Scale bar (applies to all) = 300  $\mu$ m.

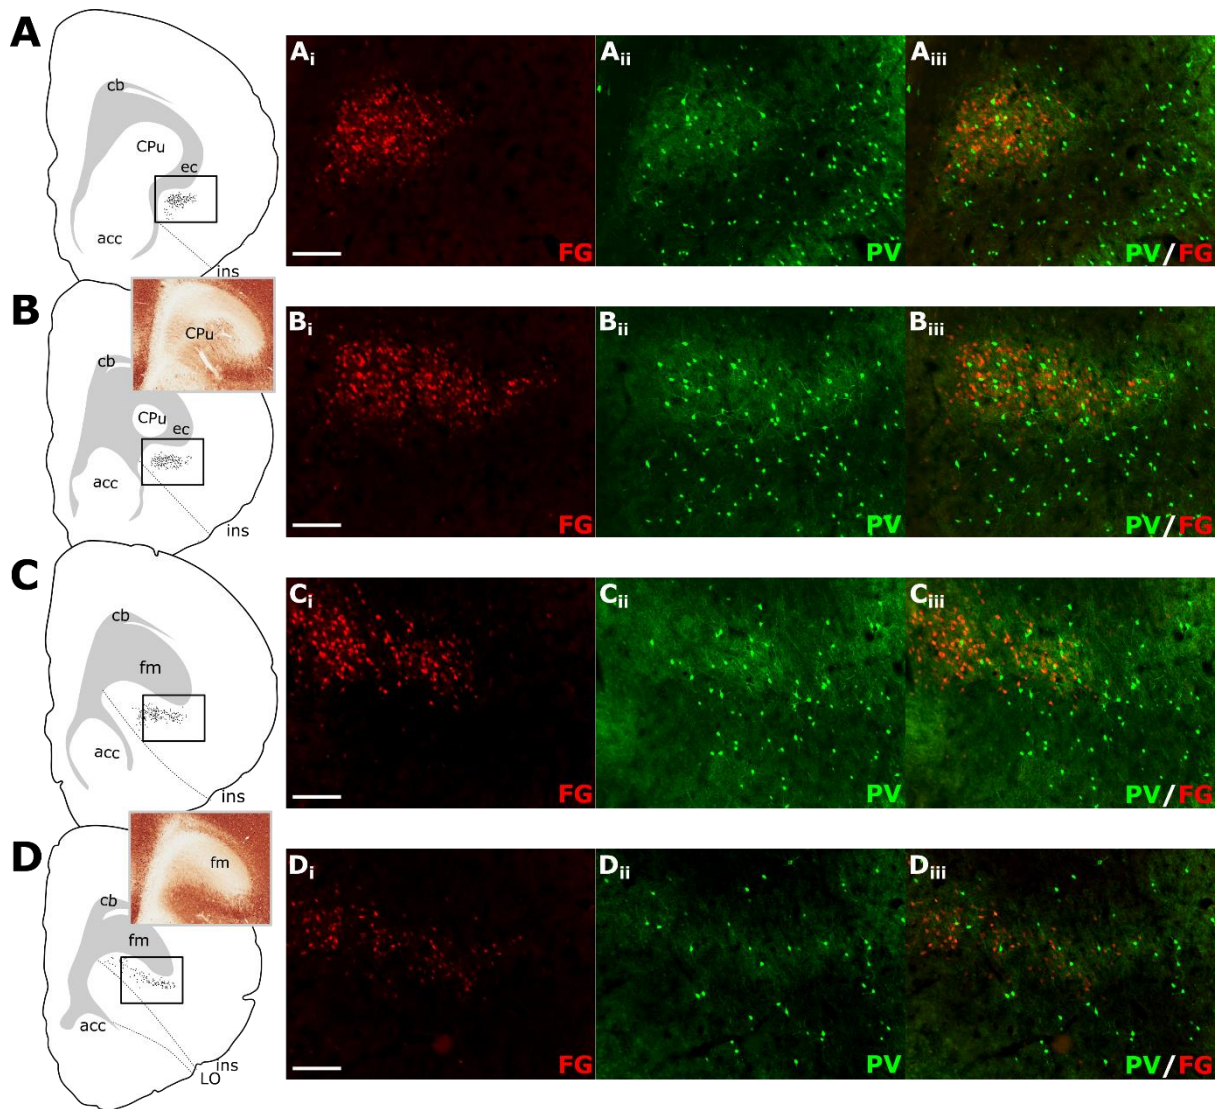

1

2

3

4

5

6

7

8

9

10

11

12

13

14

15

16

**Figure S4.** Tracer injections of Fluorogold (FG) within retrosplenial cortex resulted in dense retrograde label throughout the extent of the ipsilateral claustrum. **A-D:** Schematic tracings of caudal (striatal (CPu); **A-B**) to rostral (anterior to striatum; **C-D**) brain sections showing retrograde label in the claustrum\*. Rectangles in **A-D** show regions shown in corresponding fluorescence micrographs (i-iii). Dual-fluorescence experiments showed that parvalbumin neuropil expression (PV; green) closely overlaid that of the FG retrograde label (FG; red). Insets in **B** and **D** show anterior-posterior level relative to CPu in parvalbumin-reacted tissue. Scale bars = 200  $\mu$ m.

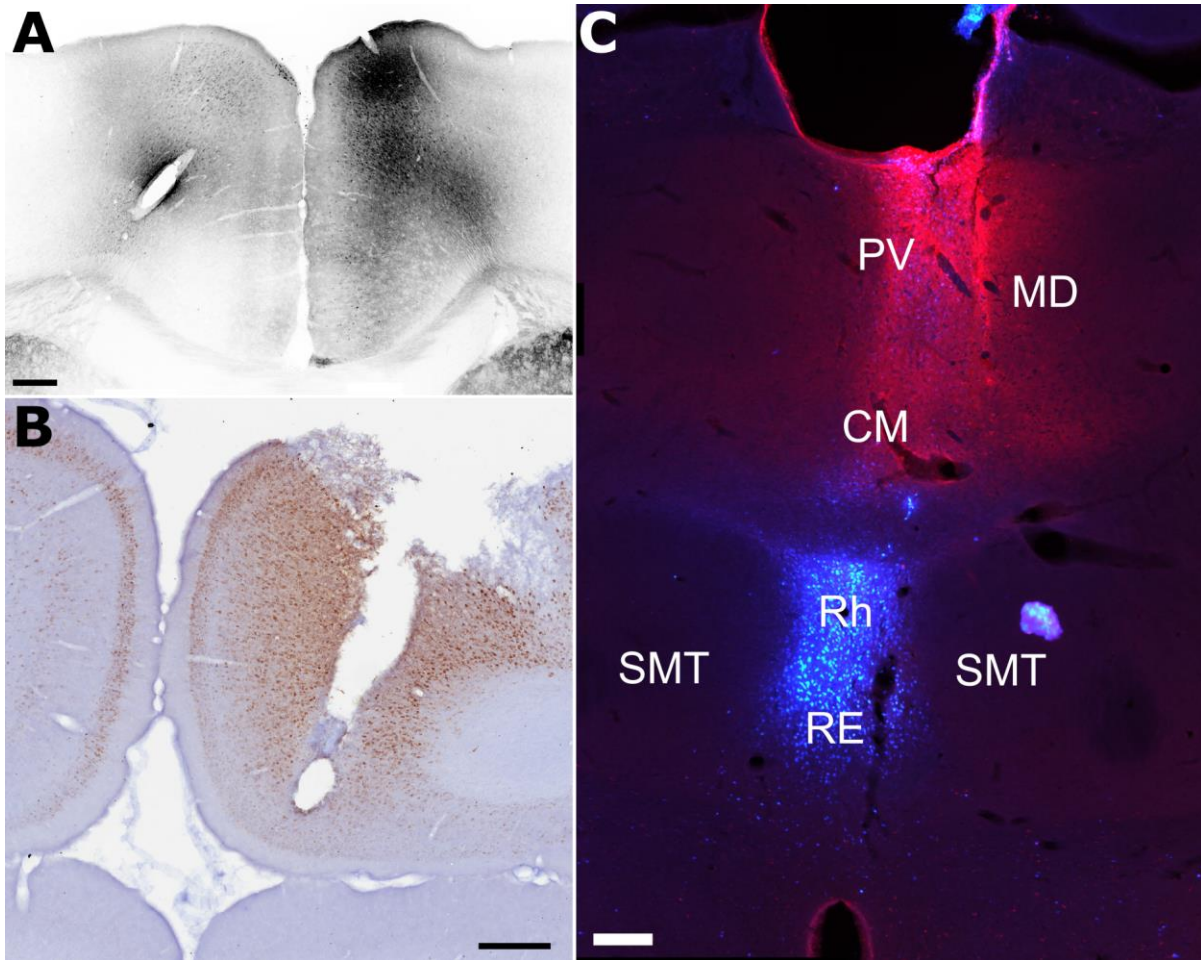

1

2 **Figure S5.** Cortical (A-B) and thalamic (C) pressure injections of neuronal tracer were used to assess claustrum  
3 connectivity profiles. **A**, an example of a pAAV-CaMKIIa-hM4D(Gi)-Mcherry pressure injection into the anterior  
4 cingulate cortex (case 219#3); **B**, an example of a Fluoro-gold pressure injection into the anterior cingulate  
5 cortex (FGRSC1) **C**, An example of an injection site of cholera-toxin b (red) and Fast Blue (blue) injection sites  
6 in the centromedial (CM)/paraventricular (PV)/mediodorsal (MD) and nucleus reuniens (RE)/rhomboid (Rh),  
7 respectively. Abbreviations: SMT, submedius thalamic nucleus. Scale bar in **A** = 400 μm; **B-C** = 200 μm.

8
